# Supplementary material
Source: publisher figshare collection journal article supplement (https://tandf.figshare.com/ndownloader/files/17177927)
Supplement: Supplementary file 1 [file 17177927]

References

Aach, M. (2014). Voluntary driven exoskeleton as a new tool for rehabilitation in chronic spinal cord injury: a pilot study. *Spine J*, 2847-2853. http://dx.doi.org/10.1016/j.spinee.2014.03.042

Abdul-Sattar, A. (2014). Predictors of functional outcome in patients with traumatic spinal cord injury after inpatient rehabilitation: in Saudi Arabia. *NeuroRehabilitation*, *35*(2), 341-347. http://dx.doi.org/10.3233/NRE-141111

Ackerman, P. (2010). Using the Spinal Cord Independence Measure III to measure functional recovery in a post-acute spinal cord injury program. *Spinal Cord*, *48*(5), 380-387. http://dx.doi.org/10.1038/sc.2009.140

Aidinoff, E. (2011). Expected spinal cord independence measure, third version, scores for various neurological levels after complete spinal cord lesions. *Spinal Cord*, *49*(8), 893-896. http://dx.doi.org/10.1038/sc.2011.32

Aidinoff, E. (2012). Non-linear formulas for the spinal cord injury ability realization measurement index. *Spinal Cord*, *50*(4), 324-327. http://dx.doi.org/10.1038/sc.2011.145

Aito, S. (2007). Neurological and functional outcome in traumatic central cord syndrome. *Spinal Cord*, *45*(4), 292-297. http://dx.doi.org/10.1038/sj.sc.3101944

Alcobendas-Maestro, M. (2012). Lokomat robotic-assisted versus overground training within 3 to 6 months of incomplete spinal cord lesion: randomized controlled trial. *Neurorehabil Neural Repair*, *26*(9), 1058-1063. http://dx.doi.org/10.1177/1545968312448232

Alexeeva, N. (2011). Comparison of training methods to improve walking in persons with chronic spinal cord injury: a randomized clinical trial. *J Spinal Cord Med*, *34*(4), 362-379. http://dx.doi.org/10.1179/2045772311Y.0000000018

Alexeeva, N. (2016). Efficacy of QuadroPulse rTMS for improving motor function after spinal cord injury: Three case studies. *J Spinal Cord Med*, *39*(1), 50-57. http://dx.doi.org/10.1179/2045772314Y.0000000279

Al-Habib, A. (2011). Clinical predictors of recovery after blunt spinal cord trauma: systematic review. *J Neurotrauma*, *28*(8), 1431-1443. http://dx.doi.org/10.1089/neu.2009.1157

AlHuthaifi, F. (2016). Predictors of functional outcomes in adults with traumatic spinal cord injury following inpatient rehabilitation: A systematic review. *J Spinal Cord Med*, 1-13. http://dx.doi.org/10.1080/10790268.2016.1238184

Amatachaya, S. (2010). Factors Related to Obstacle Crossing in Independent Ambulatory Patients With Spinal Cord Injury. *J Spinal Cord Med*, *33*(2), 144-149. Retrieved from MEDLINE database.

Amatachaya, S. (2011). Functional abilities, incidences of complications and falls of patients with spinal cord injury 6 months after discharge. *Spinal Cord*, *49*(4), 520-524. http://dx.doi.org/10.1038/sc.2010.163

Amatachaya, S. (2015). Failures on obstacle crossing task in independent ambulatory patients with spinal cord injury and associated factors. *Arch Phys Med Rehabil*, *96*(1), 43-48. http://dx.doi.org/10.1016/j.apmr.2014.07.411

Aminmansour, B. (2016). Effects of progesterone and vitamin D on outcome of patients with acute traumatic spinal cord injury; a randomized, double- blind, placebo controlled study. *J Spinal Cord Med*, *39*(3), 272-280. http://dx.doi.org/10.1080/10790268.2015.1114224

Anderson, C. (2003). Community integration among adults with spinal cord injuries sustained as children or adolescents. *Dev Med Child Neurol*, *45*(2), 129-134. Retrieved from MEDLINE database.

Anderson, C. (2003). Domain-specific satisfaction in adults with pediatric-onset spinal cord injuries. *Spinal Cord*, *41*(12), 684-691. http://dx.doi.org/10.1038/sj.sc.3101533

Anderson, D. (2012). Traumatic central cord syndrome: neurologic recovery after surgical management. *Am J Orthop*, *41*(8), 104-108. Retrieved from MEDLINE database.

Anderson, K. (2008). Functional recovery measures for spinal cord injury: an evidence-based review for clinical practice and research. *J Spinal Cord Med*, *31*(2), 133-144. Retrieved from MEDLINE database.

Anderson, K. (2011). United States (US) multi-center study to assess the validity and reliability of the Spinal Cord Independence Measure (SCIM III). *Spinal Cord*, *49*(8), 880-885. http://dx.doi.org/10.1038/sc.2011.20

Anneken, V. (2010). Influence of physical exercise on quality of life in individuals with spinal cord injury. *Spinal Cord*, *48*(5), 393-399. http://dx.doi.org/10.1038/sc.2009.137

Anton, H. (2008). Measuring fatigue in persons with spinal cord injury. *Arch Phys Med Rehabil*, *89*(3), 538-542. http://dx.doi.org/10.1016/j.apmr.2007.11.009

Arango-Lasprilla, J. (2009). Ethnicity/racial differences in employment outcomes following spinal cord injury. *NeuroRehabilitation*, *24*(1), 37-46. http://dx.doi.org/10.3233/NRE-2009-0452

Arija-Blázquez, A. (2014). Effects of electromyostimulation on muscle and bone in men with acute traumatic spinal cord injury: A randomized clinical trial. *J Spinal Cord Med*, *37*(3), 299-309. http://dx.doi.org/10.1179/2045772313Y.0000000142

Ayaz, S. (2014). Spinal cord injury secondary to front rolls as part of military physical training: a case report. *NeuroRehabilitation*, *34*(3), 473-477. https://dx.doi.org/10.3233/NRE-141064

Backus, D. (2013). Relation between inpatient and postdischarge services and outcomes 1 year postinjury in people with traumatic spinal cord injury. *Arch Phys Med Rehabil*, 165-174. http://dx.doi.org/10.1016/j.apmr.2013.01.012

Backus, D. (2014). Assisted movement with proprioceptive stimulation reduces impairment and restores function in incomplete spinal cord injury. *Arch Phys Med Rehabil*, *95*(8), 1447-1453. http://dx.doi.org/10.1016/j.apmr.2014.03.011

Bagnall, A. (2008). Spinal fixation surgery for acute traumatic spinal cord injury. *Cochrane Database Syst Rev*, *23*(1). http://dx.doi.org/10.1002/14651858.CD004725.pub2

Bailey, J. (2012). Relationship of nursing education and care management inpatient rehabilitation interventions and patient characteristics to outcomes following spinal cord injury: the SCIRehab project. *J Spinal Cord Med*, *35*(6), 593-610. http://dx.doi.org/10.1179/2045772312Y.0000000067

Baldassarre, M. (2015). Exploring the Relationship Between Mild Traumatic Brain Injury Exposure and the Presence and Severity of Postconcussive Symptoms Among Veterans Deployed to Iraq and Afghanistan. *American Journal of Physical Medicine and Rehabilitation*, *7*(8), 845-858. http://dx.doi.org/10.1016/j.pmrj.2015.03.003

Ballinger, D. (2000). The relation of shoulder pain and range-of-motion problems to functional limitations, disability, and perceived health of men with spinal cord injury: a multifaceted longitudinal study. *Arch Phys Med Rehabil*, *81*(12), 1575-1581. http://dx.doi.org/10.1053/apmr.2000.18216

Bang, M. (2009). Progression of spinal cord atrophy by traumatic or inflammatory myelopathy in the pediatric patients: case series. *Spinal Cord*, *47*(11), 822-825. http://dx.doi.org/10.1038/sc.2008.175

Bani, A. (2003). Atlantooccipital distraction: a diagnostic and therapeutic dilemma: report of two cases. *Spine*, *28*(5), 95-97. http://dx.doi.org/10.1097/01.BRS.0000048657.52464.F7

Bank, M. (2015). Elevated circulating levels of the pro-inflammatory cytokine macrophage migration inhibitory factor in individuals with acute spinal cord injury. *Arch Phys Med Rehabil*, *96*(4), 633-644. http://dx.doi.org/10.1016/j.apmr.2014.10.021

Barker, R. (2007). Reliability of the clinical outcome variables scale when administered via telephone to assess mobility in people with spinal cord injury. *Arch Phys Med Rehabil*, *88*(5), 632-637. http://dx.doi.org/10.1016/j.apmr.2007.02.032

Bartels, R. (2013). Design of COSMIC: a randomized, multi-centre controlled trial comparing conservative or early surgical management of incomplete cervical cord syndrome without spinal instability. *BMC Musculoskelet Disord*. http://dx.doi.org/10.1186/1471-2474-14-52

Barus, D. (2006). The evaluation and treatment of elbow dysfunction secondary to spasticity and paralysis. *J Hand Ther*, *19*(2), 192-205. http://dx.doi.org/10.1197/j.jht.2006.02.012

Beck, L. (199). Factors influencing functional outcome and discharge disposition after thoracic spinal cord injury. *SCI Nurs*, *16*(4), 127-132. Retrieved from Pubmed database.

Behrman, A. (2000). Locomotor training after human spinal cord injury: a series of case studies. *Phys Ther*, *80*(7), 688-700. Retrieved from MEDLINE database.

Behrman, A. (2005). Locomotor training progression and outcomes after incomplete spinal cord injury. *Phys Ther*, *85*(12), 1356-1371. Retrieved from MEDLINE database.

Behrman, A. (2008). Locomotor Training Restores Walking in a Nonambulatory Child With Chronic, Severe, Incomplete Cervical Spinal Cord Injury. *Phys Ther*, *88*(5), 580-590. http://dx.doi.org/10.2522/ptj.20070315

Belliveau, T. (2016). Developing Artificial Neural Network Models to Predict Functioning One Year After Traumatic Spinal Cord Injury. *Arch Phys Med Rehabil*, *97*(10), 1663-1668. http://dx.doi.org/10.1016/j.apmr.2016.04.014

Benavente, A. (2003). Assessment of disability in spinal cord injury. *Disabil Rehabil*, *25*(18), 1065-1070. http://dx.doi.org/10.1080/0963828031000137775

Benito Penalva, J. (2010). H reflex modulation by transcranial magnetic stimulation in spinal cord injury subjects after gait training with electromechanical systems. *Spinal Cord*, *48*(5), 400-406. http://dx.doi.org/10.1038/sc.2009.151

Benito-Penalva, J. (2012). Gait training in human spinal cord injury using electromechanical systems: effect of device type and patient characteristics. *Arch Phys Med Rehabil.*, *93*(3), 404-412. http://dx.doi.org/10.1016/j.apmr.2011.08.028

Bernsen, H. (2000). Neuropraxia of the cervical spinal cord following cervical spinal cord trauma: a report of five patients. *Acta Neurol Belg*, *100*(2), 91-95. Retrieved from MEDLINE database.

Berry, C. (2003). A psychometric analysis of the Needs Assessment Checklist (NAC). *Spinal Cord*, *41*(9), 490-501. http://dx.doi.org/10.1038/sj.sc.3101460

Betker, A. (2007). Game-based exercises for dynamic short-sitting balance rehabilitation of people with chronic spinal cord and traumatic brain injuries. *Phys Ther*, *87*(10), 1389-1398. http://dx.doi.org/10.2522/ptj.20060229

Bhatoe, H. (2000). Cervical spinal cord injury without radiological abnormality in adults. *Neurol India*, *48*(3), 243-248. Retrieved from MEDLINE database.

Biering-Sørensen, F. (2004). Mobility aids and transport possibilities 10-45 years after spinal cord injury. *Spinal Cord*, *42*(12), 699-705. http://dx.doi.org/10.1038/sj.sc.3101649

Bishop, L. (2012). Robot-aided gait training in an individual with chronic spinal cord injury: a case study. *J Neurol Phys Ther*, *36*(3), 138-143. http://dx.doi.org/10.1097/NPT.0b013e3182624c87

Bluvshtein, V. (2011). SCIM III is reliable and valid in a separate analysis for traumatic spinal cord lesions. *Spinal Cord*, *49*(2), 292-296. http://dx.doi.org/10.1038/sc.2010.111

Bluvshtein, V. (2012). A new grading for easy and concise description of functional status after spinal cord lesions. *Spinal Cord*, *50*(1), 42-50. http://dx.doi.org/10.1038/sc.2011.84

Bode, R. (2002). Course of functional improvement after stroke, spinal cord injury, and traumatic brain injury. *Arch Phys Med Rehabil*, *83*(1), 100-106. Retrieved from Pubmed database.

Bode, R. (2014). Self-scoring templates for motor and cognitive subscales of the FIM instrument for persons with spinal cord injury. *Arch Phys Med Rehabil*, *95*(4), 676-679. http://dx.doi.org/10.1016/j.apmr.2013.11.009

Bombardier, C. (2004). Do preinjury alcohol problems predict poorer rehabilitation progress in persons with spinal cord injury? *Arch Phys Med Rehabil*, *85*(9), 1488-1492. Retrieved from MEDLINE database.

Bombardier, C. (2016). Comorbid Traumatic Brain Injury and Spinal Cord Injury: Screening Validity and Effect on Outcomes. *Arch Phys Med Rehabil.*, *97*(10), 1628-1634. http://dx.doi.org/10.1016/j.apmr.2016.03.008

Bowden, M. (2007). Step Activity Monitor: accuracy and test-retest reliability in persons with incomplete spinal cord injury. *J Rehabil Res Dev*, *44*(3), 355-362. Retrieved from MEDLINE database.

Bowden, M. (2008). Beyond gait speed: a case report of a multidimensional approach to locomotor rehabilitation outcomes in incomplete spinal cord injury. *J Neurol Phys Ther*, *32*(3), 129-138. http://dx.doi.org/10.1097/NPT.0b013e3181838291

Bradbury, C. (2008). Traumatic brain injury in patients with traumatic spinal cord injury: clinical and economic consequences. *Arch Phys Med Rehabil*. http://dx.doi.org/10.1016/j.apmr.2008.07.008

Brown, G. (2014). Classifying and predicting endurance outcomes of α2-adrenergic agonist intervention in spinal cord injury. *Conf Proc IEEE Eng Med Biol Soc*, 5896-5899. http://dx.doi.org/10.1109/EMBC.2014.6944970

Brubaker, M. (2016). Clinical features and inpatient rehabilitation outcomes of infection-related myelopathy. *Spinal Cord*. http://dx.doi.org/10.1038/sc.2016.115

Brurok, B. (2011). Effect of aerobic high-intensity hybrid training on stroke volume and peak oxygen consumption in men with spinal cord injury. *Am J Phys Med Rehabil*, *90*(5), 407-414. http://dx.doi.org/10.1097/PHM.0b013e31820f960f

Buehner, J. (2012). Relationship between ASIA examination and functional outcomes in the NeuroRecovery Network Locomotor Training Program. *Arch Phys Med Rehabil.*, *93*(9), 1530-1540. http://dx.doi.org/10.1016/j.apmr.2012.02.035

Burnett, D. (2002). Impact of minority status following traumatic spinal cord injury. *NeuroRehabilitation*, *17*(3), 187-194. Retrieved from Pubmed database.

Burns, A. (2011). The reproducibility and convergent validity of the walking index for spinal cord injury (WISCI) in chronic spinal cord injury. *Neurorehabil Neural Repair*, *25*(2), 149-157. http://dx.doi.org/10.1177/1545968310376756

Cahow, C. (2012). Relationship of therapeutic recreation inpatient rehabilitation interventions and patient characteristics to outcomes following spinal cord injury: the SCIRehab project. *J Spinal Cord Med.*, *35*(6), 547-564. http://dx.doi.org/10.1016/j.apmr.2016.04.014

Calhoun, C. (2009). A pilot study of observational motor assessment in infants and toddlers with spinal cord injury. *Pediatr Phys Ther*, *21*(1), 62-67. http://dx.doi.org/10.1097/PEP.0b013e31818f5bbd

Calhoun, C. (2012). Pilot study of reliability and validity of the Walking Index for Spinal Cord Injury II (WISCI-II) in children and adolescents with spinal cord injury. *J Pediatr Rehabil Med*, *5*(4), 275-279. http://dx.doi.org/10.3233/PRM-2012-00224

Cantu, R. (2013). Return to play after cervical spine injury in sports. *Curr Sports Med Rep*, *12*(1), 14-17. http://dx.doi.org/10.1249/JSR.0b013e31827dc1fb

Carlson, K. (2009). Effect of exercise on disorders of carbohydrate and lipid metabolism in adults with traumatic spinal cord injury: systematic review of the evidence. *J Spinal Cord Med*, *32*(4), 361-378. Retrieved from Pubmed database.

Catz, A. (1997). SCIM--spinal cord independence measure: a new disability scale for patients with spinal cord lesions. *Spinal Cord*, *35*(12), 850-856. Retrieved from MEDLINE database.

Catz, A. (2001). The Catz-Itzkovich SCIM: a revised version of the Spinal Cord Independence Measure. *Disabil Rehabil*, *23*(6), 263-268. Retrieved from MEDLINE database.

Catz, A. (2004). A new instrument for outcome assessment in rehabilitation medicine: Spinal cord injury ability realization measurement index. *Arch Phys Med Rehabil*, *85*(3), 399-404. Retrieved from MEDLINE database.

Catz, A. (2004). Recovery of neurologic function following nontraumatic spinal cord lesions in Israel. *Spine*, *29*(20), 2278-2282. Retrieved from MEDLINE database.

Catz, A. (2007). Spinal Cord Independence Measure: comprehensive ability rating scale for the spinal cord lesion patient. *J Rehabil Res Dev*, *44*(1), 65-68. Retrieved from MEDLINE database.

Chan, S. (2005). Rehabilitation outcomes following traumatic spinal cord injury in a tertiary spinal cord injury centre: a comparison with an international standard. *Spinal Cord*, *43*(8), 489-498. http://dx.doi.org/10.1038/sj.sc.3101743

Chan, S. (2013). One-year follow-up of Chinese people with spinal cord injury: a preliminary study. *J Spinal Cord Med*, *36*(1), 12-23. http://dx.doi.org/10.1179/1079026812Z.00000000059

Charlifue, S. (2010). Aging with spinal cord injury. *Phys Med Rehabil Clin N Am*, *21*(2), 383-402. http://dx.doi.org/10.1016/j.pmr.2009.12.002

Charlifue, S. (2011). Mechanical ventilation, health, and quality of life following spinal cord injury. *Arch Phys Med Rehabil*, *92*(3), 457-463. http://dx.doi.org/10.1016/j.apmr.2010.07.237

Chen, Y. (2008). Change in life satisfaction of adults with pediatric-onset spinal cord injury. *Arch Phys Med Rehabil*, *89*(12), 2285-2292. http://dx.doi.org/10.1016/j.apmr.2008.06.008

Chen, Y. (2011). Weight matters: physical and psychosocial well being of persons with spinal cord injury in relation to body mass index. *Arch Phys Med Rehabil*, *92*(3), 391-398. http://dx.doi.org/10.1016/j.apmr.2010.06.030

Chhabra, H. (2013). Neglected traumatic spinal cord injuries: causes, consequences and outcomes in an Indian setting. *Spinal Cord*, *51*(3), 238-244. http://dx.doi.org/10.1038/sc.2012.141

Childs, B. (2015). American Spinal Injury Association Impairment Scale Predicts the Need for Tracheostomy After Cervical Spinal Cord Injury. *Spine*, 1407-1413. http://dx.doi.org/10.1097/BRS.0000000000001008

Clark, M. (2008). Testosterone replacement therapy and motor function in men with spinal cord injury: a retrospective analysis. *Am J Phys Med Rehabil*, *87*(4), 281-284. http://dx.doi.org/10.1097/PHM.0b013e318168bbec

Coleman, W. (2004). Injury severity as primary predictor of outcome in acute spinal cord injury: retrospective results from a large multicenter clinical trial. *Spine J*, 373-378. http://dx.doi.org/10.1016/j.spinee.2003.12.006

Consortium for Spinal Cord Medicine. (2000). *CLINICAL PRACTICE GUIDELINES Spinal Cord Medicine: Outcomes following traumatic spinal cord injury: clinical practice guidelines for health-care professionals*. Retrieved from Pubmed database.

Copes, W. (1996). Linking data from national trauma and rehabilitation registries. *J Trauma*, *40*(3), 428-436. Retrieved from Pubmed database.

Cosar, S. (2010). Demographic characteristics after traumatic and non-traumatic spinal cord injury: a retrospective comparison study. *Spinal Cord*, *48*(12), 862-866. http://dx.doi.org/10.1038/sc.2010.49

Cossu, G. (2014). Therapeutic options to enhance coma arousal after traumatic brain injury: state of the art of current treatments to improve coma recovery. *Br J Neurosurg*, *28*(2), 187-198. http://dx.doi.org/10.3109/02688697.2013.841845

Crock, H. (2005). Commentary on the prevention of paralysis after traumatic spinal cord injury in humans: the neglected factor--urgent restoration of spinal cord circulation. *Eur Spine J*, *14*(9), 910-914. http://dx.doi.org/10.1007/s00586-005-0924-4

Cruise, C. (2006). Rehabilitation outcomes in the older adult. *Clin Geriatr Med*, *22*(2), 257-267. http://dx.doi.org/10.1016/j.cger.2005.12.015

Cushman, L. (2002). A pilot study of perceived needs of persons with new spinal cord injury. *Psychol Rep*, 1153-1160. http://dx.doi.org/10.2466/pr0.2002.90.3c.1153

Cusick, C. (2001). The use of proxies in community integration research. *Arch Phys Med Rehabil*, *82*(8), 1018-1024. http://dx.doi.org/10.1053/apmr.2001.25098

Datta, S. (2009). A multivariate examination of temporal changes in Berg Balance Scale items for patients with ASIA Impairment Scale C and D spinal cord injuries. *Arch Phys Med Rehabil*, *90*(7), 1208-1217. http://dx.doi.org/10.1016/j.apmr.2008.09.577

Datta, S. (2012). Dynamic longitudinal evaluation of the utility of the Berg Balance Scale in individuals with motor incomplete spinal cord injury. *Arch Phys Med Rehabil*, *93*(9), 1565-1573. http://dx.doi.org/10.1016/j.apmr.2012.01.026

Dawson, J. (2008). A structured review of outcome measures used for the assessment of rehabilitation interventions for spinal cord injury. *Spinal Cord*, *46*(12), 768-780. http://dx.doi.org/10.1038/sc.2008.50

Day, M. (2013). The role of initial physical activity experiences in promoting posttraumatic growth in Paralympic athletes with an acquired disability. *Disabil Rehabil*, *35*(24), 2064-2072. http://dx.doi.org/10.3109/09638288.2013.805822

Deconinck, H. (2003). The health condition of spinal cord injuries in two Afghan towns. *Spinal Cord*, *41*(5), 303-309. http://dx.doi.org/10.1038/sj.sc.3101443

Derakhshanrad, N. (2013). Safety of granulocyte colony-stimulating factor (G-CSF) administration for postrehabilitated motor complete spinal cord injury patients: an open-label, phase I study. *Cell Transplant*, 139-146. http://dx.doi.org/10.3727/096368913X672109

Derakhshanrad, N. (2013). Safety of intramedullary autologous peripheral nerve grafts for post-rehabilitated complete motor spinal cord injuries: a phase I study. *Acta Med Iran*, *51*(12), 842-854. Retrieved from MEDLINE database.

Derakhshanrad, N. (2015). Functional impact of multidisciplinary outpatient program on patients with chronic complete spinal cord injury. *Spinal Cord*, *53*(12), 860-865. http://dx.doi.org/10.1038/sc.2015.136

De Wolf, A. (2010). Measuring community integration after spinal cord injury: validation of the Sydney psychosocial reintegration scale and community integration measure. *Qual Life Res*, *19*(8), 1185-1193. http://dx.doi.org/10.1007/s11136-010-9685-6

Dididze, M. (2013). Systemic hypothermia in acute cervical spinal cord injury: a case-controlled study. *Spinal Cord*, *51*(5), 395-400. http://dx.doi.org/10.1038/sc.2012.161

Dijkers, M. (2002). A tale of two countries: environmental impacts on social participation after spinal cord injury. *Spinal Cord*, *40*(7), 351-362. http://dx.doi.org/10.1038/sj.sc.3101310

Dijkers, M. (2012). Team size in spinal cord injury inpatient rehabilitation and patient participation in therapy sessions: The SCIRehab Project. *J Spinal Cord Med*, *35*(6), 624-634. http://dx.doi.org/10.1179/2045772312Y.0000000065

Dijkers, M. (2013). Factors complicating treatment sessions in spinal cord injury rehabilitation: nature, frequency, and consequences. *Arch Phys Med Rehabil*, 115-124. http://dx.doi.org/10.1016/j.apmr.2012.11.047

Dinomais, M. (2009). Significant recovery of motor function in a patient with complete T7 paraplegia receiving etanercept. *J Rehabil Med*, *41*(4), 286-288. http://dx.doi.org/10.2340/16501977-0329

Dionyssiotis, Y. (2012). Consequences of neurologic lesions assessed by Barthel Index after Botox(®) injection may be underestimated. *Ther Clin Risk Manag*, 385-391. http://dx.doi.org/10.2147/TCRM.S32974

Dittuno, P. (2001). Walking index for spinal cord injury (WISCI II): scale revision. *Spinal Cord*, *39*(12), 654-656. http://dx.doi.org/10.1038/sj.sc.3101223

Ditunno, J. (2000). Walking index for spinal cord injury (WISCI): an international multicenter validity and reliability study. *Spinal Cord*, *38*(4), 234-243. Retrieved from MEDLINE database.

Ditunno, J. (2005). Neurological and functional capacity outcome measures: essential to spinal cord injury clinical trials. *J Rehabil Res Dev*, 35-41. Retrieved from MEDLINE database.

Ditunno, J. (2009). Clinical relevance of gait research applied to clinical trials in spinal cord injury. *Brain Res Bull*, *78*(1), 35-42. http://dx.doi.org/10.1016/j.brainresbull.2008.09.003

Ditunno, J. (2010). Outcome measures: evolution in clinical trials of neurological/functional recovery in spinal cord injury. *Spinal Cord*, *48*(9), 674-684. http://dx.doi.org/10.1038/sc.2009.198

Ditunno, J., Jr. (2007). Validity of the walking scale for spinal cord injury and other domains of function in a multicenter clinical trial. *Neurorehabil Neural Repair*, *21*(6), 539-550. http://dx.doi.org/10.1177/1545968307301880

Divanoglou, A. (2010). Medical conditions and outcomes at 1 year after acute traumatic spinal cord injury in a Greek and a Swedish region: a prospective, population-based study. *Spinal Cord*, *48*(6), 470-476. http://dx.doi.org/10.1038/sc.2009.147

Do, A. (2013). Brain-computer interface controlled robotic gait orthosis. *J Neuroeng Rehabil*. http://dx.doi.org/10.1186/1743-0003-10-111

Dobkin, B. (2007). The evolution of walking-related outcomes over the first 12 weeks of rehabilitation for incomplete traumatic spinal cord injury: the multicenter randomized Spinal Cord Injury Locomotor Trial. *Neurorehabil Neural Repair*, *21*(1), 25-35. http://dx.doi.org/10.1177/1545968306295556

Dobscha, S. (2008, September). *VA Evidence-based Synthesis Program Reports: Pain in Patients with Polytrauma: A Systematic Review*. Retrieved from Pubmed database.

Dorsett, P. (2008). Health-related outcomes of people with spinal cord injury--a 10 year longitudinal study. *Spinal Cord*, *46*(5), 386-391. http://dx.doi.org/10.1038/sj.sc.3102159

Duffell, L. (2015). Interventions to Reduce Spasticity and Improve Function in People With Chronic Incomplete Spinal Cord Injury: Distinctions Revealed by Different Analytical Methods. *Neurorehabil Neural Repair*, *29*(6), 566-576. http://dx.doi.org/10.1177/1545968314558601

Dunn, J. (2009). Utilisation of patient perspective to validate clinical measures of outcome following spinal cord injury. *Disabil Rehabil*, *31*(12), 967-975. http://dx.doi.org/10.1080/09638280802358407

Eastwood, E. (1999). Medical rehabilitation length of stay and outcomes for persons with traumatic spinal cord injury--1990-1997. *Arch Phys Med Rehabil*, *80*(11), 1457-1463. Retrieved from Pubmed database.

El-Kheir, W. (2014). Autologous bone marrow-derived cell therapy combined with physical therapy induces functional improvement in chronic spinal cord injury patients. *Cell Transplant*, *23*(6), 729-745. http://dx.doi.org/10.3727/096368913X664540

El-Masri, W. (2012). Long-term follow-up study of outcomes of bladder management in spinal cord injury patients under the care of the Midlands Centre for Spinal Injuries in Oswestry. *Spinal Cord*, *50*(1), 14-21. http://dx.doi.org/10.1038/sc.2011.78

Enicker, B. (2015). Spinal stab injury with retained knife blades: 51 Consecutive patients managed at a regional referral unit. *Injury*, *46*(9), 1726-1733. http://dx.doi.org/10.1016/j.injury.2015.05.037

Enzinger, C. (2008). Brain motor system function in a patient with complete spinal cord injury following extensive brain-computer interface training. *Exp Brain Res*, *190*(2), 215-223. http://dx.doi.org/10.1007/s00221-008-1465-y

Equebal, A. (2013). The prevalence and impact of age and gender on rehabilitation outcomes in spinal cord injury in India: a retrospective pilot study. *Spinal Cord*, *51*(5), 409-412. http://dx.doi.org/10.1038/sc.2013.5

Eriks-Hoogland, I. (2011). Category specification and measurement instruments in large spinal cord injury studies: a comparison using the International Classification of Functioning, Disability, and Health as a reference. *Am J Phys Med Rehabil.*, 39-49. http://dx.doi.org/10.1097/PHM.0b013e318230fc83

Esclari?n-Ruz, A. (2014). A comparison of robotic walking therapy and conventional walking therapy in individuals with upper versus lower motor neuron lesions: a randomized controlled trial. *Arch Phys Med Rehabil*, *95*(6), 1023-1031. http://dx.doi.org/10.1016/j.apmr.2013.12.017

Failli, V. (2012). Functional neurological recovery after spinal cord injury is impaired in patients with infections. *Brain*, 3238-3250. http://dx.doi.org/10.1093/brain/aws267

Falci, S. (2002). Dorsal root entry zone microcoagulation for spinal cord injury- related central pain: operative intramedullary electrophysiological guidance and clinical outcome. *J Neurosurg*, 193-200. Retrieved from Pubmed database.

Farris, R. (2014). A preliminary assessment of legged mobility provided by a lower limb exoskeleton for persons with paraplegia. *IEEE Trans Neural Syst Rehabil Eng*, *22*(3), 482-490. http://dx.doi.org/10.1109/TNSRE.2013.2268320

Fattal, C. (2011). Metastatic paraplegia and functional outcomes: perspectives and limitations for rehabilitation care. Part 2. *Arch Phys Med Rehabil*, *92*(1), 134-145. http://dx.doi.org/10.1016/j.apmr.2010.09.016

Fenton, J. (2016). A comparison of high vs standard tidal volumes in ventilator weaning for individuals with sub-acute spinal cord injuries: a site-specific randomized clinical trial. *Spinal Cord*, *54*(3), 234-238. http://dx.doi.org/10.1038/sc.2015.145

Ferdjallah, M. (1998). Anatomical and technical considerations in surface electromyography. *Phys Med Rehabil Clin N Am*, *9*(4), 925-931. Retrieved from Pubmed database.

Fleerkotte, B. (2014). The effect of impedance-controlled robotic gait training on walking ability and quality in individuals with chronic incomplete spinal cord injury: an explorative study. *J Neuroeng Rehabil*, *11*(26). http://dx.doi.org/10.1186/1743-0003-11-26

Forchheimer, M. (2004). Enhancing community re-integration following spinal cord injury. *NeuroRehabilitation*, *19*(2), 103-113. Retrieved from MEDLINE database.

Forchheimer, M. (2011). Cut point determination in the measurement of pain and its relationship to psychosocial and functional measures after traumatic spinal cord injury: a retrospective model spinal cord injury system analysis. *Arch Phys Med Rehabil*, *92*(3), 419-424. http://dx.doi.org/10.1016/j.apmr.2010.08.029

Forrest, G. (2012). Ambulation and balance outcomes measure different aspects of recovery in individuals with chronic, incomplete spinal cord injury. *Arch Phys Med Rehabil*, *93*(9), 1553-1564. http://dx.doi.org/10.1016/j.apmr.2011.08.051

Forrest, G. (2014). Are the 10 meter and 6 minute walk tests redundant in patients with spinal cord injury? *PLoS One.*, *9*(5). http://dx.doi.org/10.1371/journal.pone.0094108

Fortin, C. (2015). Inpatient rehabilitation outcomes in patients with malignant spinal cord compression compared to other non-traumatic spinal cord injury: A population based study. *J Spinal Cord Med*, *38*(6), 754-764. http://dx.doi.org/10.1179/2045772314Y.0000000278

Foy, T. (2011). The SCIRehab project: treatment time spent in SCI rehabilitation. Occupational therapy treatment time during inpatient spinal cord injury rehabilitation. *J Spinal Cord Med*, *34*(2), 162-175. http://dx.doi.org/10.1179/107902611X12971826988093

Franke, A. (2013). Arm hand skilled performance in persons with a cervical spinal cord injury--long-term follow-up. *Spinal Cord*, *51*(2), 161-164. http://dx.doi.org/10.1038/sc.2012.95

Fransen, B. (2016). Pre-hospital and acute management of traumatic spinal cord injury in the Netherlands: survey results urge the need for standardisation. *Spinal Cord*, *54*(1), 34-38. http://dx.doi.org/10.1038/sc.2015.111

Freivogel, S. (2008). Gait training with the newly developed 'LokoHelp'-system is feasible for non-ambulatory patients after stroke, spinal cord and brain injury. A feasibility study. *Brain Inj*, 625-632. http://dx.doi.org/10.1080/02699050801941771

Fries, J. (2005). Critical rehabilitation of the patient with spinal cord injury. *Crit Care Nurs Q*, *28*(2), 179-187. Retrieved from MEDLINE database.

Fritz, H. (2015). Long-term community reintegration: concepts, outcomes and dilemmas in the case of a military service member with a spinal cord injury. *Disabil Rehabil*, *37*(16), 1501-1507. http://dx.doi.org/10.3109/09638288.2014.967415

Fritz, S. (2011). Feasibility of intensive mobility training to improve gait, balance, and mobility in persons with chronic neurological conditions: a case series. *J Neurol Phys Ther*, *35*(3), 141-147. http://dx.doi.org/10.1097/NPT.0b013e31822a2a09

Fritz, S. (2011). An intensive intervention for improving gait, balance, and mobility in individuals with chronic incomplete spinal cord injury: a pilot study of activity tolerance and benefits. *Arch Phys Med Rehabil*, *92*(11), 1776-1784. http://dx.doi.org/10.1016/j.apmr.2011.05.006

Fromovich-Amit, Y. (2009). Properties and outcomes of spinal rehabilitation units in four countries. *Spinal Cord*, *47*(8), 597-603. http://dx.doi.org/10.1038/sc.2008.178

Fuhrer, M. (1992). Relationship of life satisfaction to impairment, disability, and handicap among persons with spinal cord injury living in the community. *Arch Phys Med Rehabil*, *73*(6), 552-557. Retrieved from MEDLINE database.

Furlan, J. (2005). The effects of gender on clinical and neurological outcomes after acute cervical spinal cord injury. *J Neurotrauma*, *22*(3), 368-381. http://dx.doi.org/10.1089/neu.2005.22.368

Furlan, J. (2008). Cardiovascular complications after acute spinal cord injury: pathophysiology, diagnosis, and management. *Neurosurg Focus*, *25*(5). http://dx.doi.org/10.3171/FOC.2008.25.11.E13

Furlan, J. (2009). The impact of age on mortality, impairment, and disability among adults with acute traumatic spinal cord injury. *J Neurotrauma*, *26*(10), 1707-1717. http://dx.doi.org/10.1089/neu.2009.0888

Furlan, J. (2010). Is age a key determinant of mortality and neurological outcome after acute traumatic spinal cord injury? *Neurobiol Aging*, *31*(3), 434-446. http://dx.doi.org/10.1016/j.neurobiolaging.2008.05.003

Furlan, J. (2011). Assessment of disability in patients with acute traumatic spinal cord injury: a systematic review of the literature. *J Neurotrauma*, *28*(8), 1413-1430. http://dx.doi.org/10.1089/neu.2009.1148

Furlan, J. (2013). The influence of age on functional recovery of adults with spinal cord injury or disease after inpatient rehabilitative care: a pilot study. *Aging Clin Exp Res*, *25*(4), 463-471. http://dx.doi.org/10.1007/s40520-013-0066-1

Furusawa, K. (2012). Effect of age on bowel management in traumatic central cord syndrome. *Spinal Cord*, *50*(1), 51-56. http://dx.doi.org/10.1038/sc.2011.90

Fyffe, D. (2014). Racial and ethnic disparities in functioning at discharge and follow-up among patients with motor complete spinal cord injury. *Arch Phys Med Rehabil*, *95*(11), 2140-2151. http://dx.doi.org/10.1016/j.apmr.2014.07.398

Fyffe, D. (2016). Clinical interpretation of the Spinal Cord Injury Functional Index (SCI-FI). *J Spinal Cord Med*, *39*(5), 527-534. http://dx.doi.org/10.1080/10790268.2015.1133483

Galen, S. (2011). A portable gait assessment tool to record temporal gait parameters in SCI. *Med Eng Phys*, *33*(5), 626-632. http://dx.doi.org/10.1016/j.medengphy.2011.01.003

Gassaway, J. (2011). Therapeutic recreation treatment time during inpatient rehabilitation. *J Spinal Cord Med*, *34*(2), 176-185. http://dx.doi.org/10.1179/107902611X12971826988138

Geigle, P. (2013). Atypical autonomic dysreflexia during robotic-assisted body weight supported treadmill training in an individual with motor incomplete spinal cord injury. *J Spinal Cord Med*, *36*(2), 153-156. http://dx.doi.org/10.1179/2045772312Y.0000000033

George, E. (1995). Failure of methylprednisolone to improve the outcome of spinal cord injuries. *The American Surgeon*, *61*(8), 659-663. Retrieved from MEDLINE database.

Gittler, M. (2002). Spinal cord injury medicine. 3. Rehabilitation outcomes. *Arch Phys Med Rehabil.* Retrieved from Pubmed database.

Glass, C. (2009). Spinal Cord Independence Measure, version III: applicability to the UK spinal cord injured population. *J Rehabil Med*, *41*(9), 723-728. http://dx.doi.org/10.2340/16501977-0398

Golhasani-Keshtan, F. (2013). Validation and cross-cultural adaptation of the Persian version of Craig Handicap Assessment and Reporting Technique (CHART) short form. *Disabil Rehabil*, *35*(22), 1909-1914. http://dx.doi.org/10.3109/09638288.2013.768710

Gontkovsky, S. (2009). Comparison of the CIQ and CHART Short Form in assessing community integration in individuals with chronic spinal cord injury: a pilot study. *NeuroRehabilitation*, *24*(2), 185-192. http://dx.doi.org/10.3233/NRE-2009-0467

Gordan, W. (2012). Relationship of speech-language pathology inpatient rehabilitation interventions and patient characteristics to outcomes following spinal cord injury: the SCIRehab project. *J Spinal Cord Med*, *35*(6), 565-577. http://dx.doi.org/10.1179/2045772312Y.0000000063

Gorgey, A. (2010). Locomotor and resistance training restore walking in an elderly person with a chronic incomplete spinal cord injury. *NeuroRehabilitation*, *26*(2), 127-133. http://dx.doi.org/10.3233/NRE-2010-0544

Grabher, P. (2015). Tracking sensory system atrophy and outcome prediction in spinal cord injury. *Ann Neurol*, *78*(5), 751-761. http://dx.doi.org/10.1002/ana.24508

Graham, J. (2014). The Uniform Data System for Medical Rehabilitation: report of follow-up information on patients discharged from inpatient rehabilitation programs in 2002-2010. *Am J Phys Med Rehabil*, *93*(3), 231-244. http://dx.doi.org/10.1097/PHM.0b013e3182a92c58

Granger, C. (2012). The uniform data system for medical rehabilitation: report of patients with traumatic spinal cord injury discharged from rehabilitation programs in 2002-2010. *Am J Phys Med Rehabil*, *91*(4), 289-299. http://dx.doi.org/10.1097/PHM.0b013e31824ad2fd

Greenwald, B. (2001). Gender-related differences in acute rehabilitation lengths of stay, charges, and functional outcomes for a matched sample with spinal cord injury: a multicenter investigation. *Arch Phys Med Rehabil*, *82*(9), 1181-1187. http://dx.doi.org/10.1053/apmr.2001.24891

Groah, S. (2009). Nutrient Intake and Body Habitus After Spinal Cord Injury: An Analysis by Sex and Level of Injury. *J Spinal Cord Med*, *32*(1), 25-33. Retrieved from MEDLINE database.

Gulati, A. (2011). Functional outcome and discharge destination in elderly patients with spinal cord injuries. *Spinal Cord*, *49*(2), 215-218. http://dx.doi.org/10.1038/sc.2010.82

Gupta, A. (2008). Traumatic vs non-traumatic spinal cord lesions: comparison of neurological and functional outcome after in-patient rehabilitation. *Spinal Cord*, *46*(7), 482-487. http://dx.doi.org/10.1038/sj.sc.3102168

Gupta, A. (2009). Non-traumatic spinal cord lesions: epidemiology, complications, neurological and functional outcome of rehabilitation. *Spinal Cord*, *47*(4), 307-311. http://dx.doi.org/10.1038/sc.2008.123

Hall, K. (1999). Characteristics of the Functional Independence Measure in traumatic spinal cord injury. *Arch Phys Med Rehabil.*, *80*(11), 1471-1476. Retrieved from MEDLINE database.

Hammond, F. (2011). The SCIRehab project: social work and case management. Social work and case management treatment time during inpatient spinal cord injury rehabilitation. *J Spinal Cord Med*, *34*(2), 216-226. http://dx.doi.org/10.1179/107902611X12971826988291

Hammond, F. (2012). Outcomes of social work and case management services during inpatient spinal cord injury rehabilitation: the SCIRehab project. *J Spinal Cord Med*, *35*(6), 611-623. http://dx.doi.org/10.1179/2045772312Y.0000000064

Hammond, F. (2013). Acute rehospitalizations during inpatient rehabilitation for spinal cord injury. *Arch Phys Med Rehabil*, 98-105. http://dx.doi.org/10.1016/j.apmr.2012.11.05

Hammond, F. (2013). Missed therapy time during inpatient rehabilitation for spinal cord injury. *Arch Phys Med Rehabil*, *94*, 106-114. http://dx.doi.org/10.1016/j.apmr.2012.12.023

Hansebout, R. (2014). Local cooling for traumatic spinal cord injury: outcomes in 20 patients and review of the literature. *J Neurosurg Spine*, *20*(5), 550-561. http://dx.doi.org/10.3171/2014.2.SPINE13318

Hanson, C. (2001). The effect of sports on level of community integration as reported by persons with spinal cord injury. *Am J Occup Ther*, *55*(3), 332-338. Retrieved from MEDLINE database.

Hardin, E. (2013). Ambulation and Spinal Cord Injury. *Physical Medicine and Rehabilitation Clinics of North America*, *24*(2), 355-370. Retrieved from MEDLINE database.

Harel, N. (2013). Adaptation of computerized posturography to assess seated balance in persons with spinal cord injury. *J Spinal Cord Med*, *36*(2), 127-133. http://dx.doi.org/10.1179/2045772312Y.0000000053

Harkema, S. (2012). Balance and ambulation improvements in individuals with chronic incomplete spinal cord injury using locomotor training-based rehabilitation. *Arch Phys Med Rehabil.*, *93*(9), 1508-1517. http://dx.doi.org/10.1016/j.apmr.2011.01.024

Harkema, S. (2016). Assessment of Functional Improvement without Compensation for Human Spinal Cord Injury: Extending the Neuromuscular Recovery Scale to the Upper Extremities. *J Neurotrauma*, 2181-2190. http://dx.doi.org/10.1089/neu.2015.4213

Harker, W. (2002). A comparison of independent living outcomes following traumatic brain injury and spinal cord injury. *Int J Rehabil Res*, *25*(2), 93-102. Retrieved from MEDLINE database.

Harness, E. (2008). Effects of intense exercise in chronic spinal cord injury. *Spinal Cord*, *46*(11), 733-737. http://dx.doi.org/10.1038/sc.2008.56

Harrop, J. (2011). Neurologic improvement after thoracic, thoracolumbar, and lumbar spinal cord (conus medullaris) injuries. *Spine*, *36*(1), 21-25. http://dx.doi.org/10.1097/BRS.0b013e3181fd6b36

Hartigan, C. (2015). Mobility Outcomes Following Five Training Sessions with a Powered Exoskeleton. *Top Spinal Cord Inj Rehabil*, *21*(2), 93-99. http://dx.doi.org/10.1310/sci2102-93

Harvey, L. (2009). The walking index for spinal cord injury. *Aust J Physiother*, *55*(1), 66. Retrieved from MEDLINE database.

Harvey, L. (2011). International Standards for the Neurological Classification of Spinal Cord Injury. *Journal of Physiotherapy*, *57*(2), 129. Retrieved from MEDLINE database.

Hassanpour, K. (2012). Low depressive symptoms in acute spinal cord injury compared to other neurological disorders. *J Neurol*, *259*(6), 1142-1150. http://dx.doi.org/10.1007/s00415-011-6316-2

Hastings, J. (2011). The differences in self-esteem, function, and participation between adults with low cervical motor tetraplegia who use power or manual wheelchairs. *Arch Phys Med Rehabil*, *92*(11), 1785-1788. http://dx.doi.org/10.1016/j.apmr.2011.03.023

Heinemann, A. (1995). Functional status and therapeutic intensity during inpatient rehabilitation. *Am J Phys Med Rehabil*, *74*(4), 315-326. Retrieved from Pubmed database.

Heinemann, A. (2011). Measuring participation enfranchisement. *Arch Phys Med Rehabil.*, *92*(4), 564-571. http://dx.doi.org/10.1016/j.apmr.2010.07.220

Heinemann, A. (2012). Relationship of psychology inpatient rehabilitation services and patient characteristics to outcomes following spinal cord injury: The SCIRehab Project. *J Spinal Cord Med*, *35*(6), 578-592. http://dx.doi.org/10.1179/2045772312Y.0000000059

Heinemann, A. (2014). Measurement properties of the Spinal Cord Injury-Functional Index (SCI-FI) short forms. *Arch Phys Med Rehabil.*, *95*(7), 1289-1297. http://dx.doi.org/10.1016/j.apmr.2014.01.031.

Heinemann, A. (2016). Measuring Environmental Factors: Unique and Overlapping International Classification of Functioning, Disability and Health Coverage of 5 Instruments. *Arch Phys Med Rehabil*, *97*(12), 2113-2122. http://dx.doi.org/10.1016/j.apmr.2016.05.021

Herzer, K. (2016). Association Between Time to Rehabilitation and Outcomes After Traumatic Spinal Cord Injury. *Arch Phys Med Rehabil*, *97*(10), 1620-1627. http://dx.doi.org/10.1016/j.apmr.2016.05.009

Hicken, B. (2001). Bladder management and quality of life after spinal cord injury. *Am J Phys Med Rehabil*, *80*(12), 916-922. Retrieved from MEDLINE database.

Hicks, A. (2008). Treadmill training after spinal cord injury: it's not just about the walking. *J Rehabil Res Dev*, *45*(2), 241-248. Retrieved from MEDLINE database.

Hohl, J. (2010). A novel classification system for traumatic central cord syndrome: the central cord injury scale (CCIS). *Spine*, *35*(7), 238-243. http://dx.doi.org/10.1097/BRS.0b013e3181c15887

Horn, S. (2013). Association of various comorbidity measures with spinal cord injury rehabilitation outcomes. *Arch Phys Med Rehabil*, 75-86. http://dx.doi.org/10.1016/j.apmr.2012.10.036

Högel, F. (2012). Functional outcome of patients 12 and 48 weeks after acute traumatic tetraplegia and paraplegia: data analysis from 2004-2009. *Spinal Cord*, *50*(7), 517-520. http://dx.doi.org/10.1038/sc.2011.171

Hsieh, C. (2013). Comparing rehabilitation services and outcomes between older and younger people with spinal cord injury. *Arch Phys Med Rehabil*, *94*(4), 175-186. http://dx.doi.org/10.1016/j.apmr.2012.10.038

Hu, X. (2012). Analysis of functional status, quality of life and community integration in earthquake survivors with spinal cord injury at hospital discharge and one-year follow-up in the community. *J Rehabil Med*, *44*(3), 200-205. http://dx.doi.org/10.2340/16501977-0944

Hurlbert, J. (2003). Point of View. *Spine*, *28*(1), 39. Retrieved from MEDLINE database.

Inoue, T. (2014). Medical and surgical management after spinal cord injury: vasopressor usage, early surgerys, and complications. *J Neurotrauma*, *31*(3), 284-291. http://dx.doi.org/10.1089/neu.2013.3061

Invernizzi, M. (2010). Development and validation of the Italian version of the Spinal Cord Independence Measure III. *Disabil Rehabil*, *32*(14), 1194-1203. http://dx.doi.org/10.3109/09638280903437246

Itzkovich, M. (2002). Rasch analysis of the Catz-Itzkovich spinal cord independence measure. *Spinal Cord*, *40*(8), 396-407. http://dx.doi.org/10.1038/sj.sc.3101315

Itzkovich, M. (2003). Reliability of the Catz-Itzkovich Spinal Cord Independence Measure assessment by interview and comparison with observation. *Am J Phys Med Rehabil*, *82*(4), 267-272. http://dx.doi.org/10.1097/01.PHM.0000057226.22271.44

Jackson, A. (2008). Outcome measures for gait and ambulation in the spinal cord injury population. *J Spinal Cord Med*, *31*(5), 487-499. Retrieved from MEDLINE database.

Jakob, W. (2009). Difficulty of elderly SCI subjects to translate motor recovery--"body function"--into daily living activities. *J Neurotrauma*, *26*(11), 2037-2044. http://dx.doi.org/10.1089/neu.2008.0824

Jayaraman, A. (2013). Short-term maximal-intensity resistance training increases volitional function and strength in chronic incomplete spinal cord injury: a pilot study. *J Neurol Phys Ther*, *37*(3), 112-117. http://dx.doi.org/10.1097/NPT.0b013e31828390a1

Jensen, E. (2014). Medication before and after a spinal cord lesion. *Spinal Cord*, *52*(5), 358-363. http://dx.doi.org/10.1038/sc.2014.20

Jette, A. (2012). Development and initial evaluation of the spinal cord injury-functional index. *Arch Phys Med Rehabil*, *93*(10), 1733-1750. http://dx.doi.org/10.1016/j.apmr.2012.05.008

Jette, A. (2015). Development and initial evaluation of the SCI-FI/AT. *J Spinal Cord Med*, *38*(3), 409-418. http://dx.doi.org/10.1179/2045772315Y.0000000003

Jha, A. (2008). Apolipoprotein E epsilon4 allele and outcomes of traumatic spinal cord injury. *J Spinal Cord Med*, *31*(2), 171-176. Retrieved from Pubmed database.

Johnston, M. (2002). Objective and subjective handicap following spinal cord injury: interrelationships and predictors. *J Spinal Cord Med*, *25*(1), 11-22. Retrieved from MEDLINE database.

Johnstone, B. (2009). *Relationships between the Brief Multidimensional Measure of Religiousness/Spirituality and health outcomes for a heterogeneous rehabilitation population*, *54*(4). http://dx.doi.org/10.1037/a0017758

Jones, M. (2014). Activity-based therapy for recovery of walking in individuals with chronic spinal cord injury: results from a randomized clinical trial. *Arch Phys Med Rehabil*, *95*(12), 2239-2246. http://dx.doi.org/10.1016/j.apmr.2014.07.400.

Jongjit, J. (2004). Functional independence and rehabilitation outcome in traumatic spinal cord injury. *Southeast Asian J Trop Med Public Health*, *35*(4), 980-985. Retrieved from Pubmed database.

Jorge, L. (2015). New rehabilitation models for neurologic inpatients in Brazil. *Disabil Rehabil*, *37*(3), 268-273. http://dx.doi.org/10.3109/09638288.2014.914585

Jørgensen, V. (2011). Assessment of unsupported sitting in patients with spinal cord injury. *Spinal Cord*, *49*(7), 838-843. http://dx.doi.org/10.1038/sc.2011.9

Kalsi-Ryan, S. (2012). Development of the Graded Redefined Assessment of Strength, Sensibility and Prehension (GRASSP): reviewing measurement specific to the upper limb in tetraplegia. *J Neurosurg Spine*, 65-76. https://dx.doi.org/10.3171/2012.6.AOSPINE1258

Kalsi-Ryan, S. (2014). Neurological grading in traumatic spinal cord injury. *World Neurosurg*, 509-518. http://dx.doi.org/10.1016/j.wneu.2013.01.007

Kalsi-Ryan, S. (2014). Outcome of the upper limb in cervical spinal cord injury: Profiles of recovery and insights for clinical studies. *J Spinal Cord Med*, *37*(5), 503-510. http://dx.doi.org/10.1179/2045772314Y.0000000252

Kalsi-Ryan, S. (2016). Responsiveness, Sensitivity, and Minimally Detectable Difference of the Graded and Redefined Assessment of Strength, Sensibility, and Prehension, Version 1.0. *J Neurotrauma*, *33*(3), 307-314. http://dx.doi.org/10.1089/neu.2015.4217

Kapadia, N. (2011). Functional electrical stimulation therapy for grasping in traumatic incomplete spinal cord injury: randomized control trial. *Artif Organs*, *35*(3), 212-216. http://dx.doi.org/10.1111/j.1525-1594.2011.01216.x

Kapadia, N. (2014). Influence of different rehabilitation therapy models on patient outcomes: hand function therapy in individuals with incomplete SCI. *J Spinal Cord Med*, *37*(6), 734-743. http://dx.doi.org/10.1179/2045772314Y.0000000203

Kapadia, N. (2014). A randomized trial of functional electrical stimulation for walking in incomplete spinal cord injury: Effects on walking competency. *J Spinal Cord Med.*, *37*(5), 511-524. http://dx.doi.org/10.1179/2045772314Y.0000000263

Karamouzian, S. (2012). Clinical safety and primary efficacy of bone marrow mesenchymal cell transplantation in subacute spinal cord injured patients. *Clin Neurol Neurosurg*, *114*(7), 935-939. http://dx.doi.org/10.1016/j.clineuro.2012.02.003

Katoh, S. (1996). Neurologic outcome in conservatively treated patients with incomplete closed traumatic cervical spinal cord injuries. *Spine*, 2345-2351. Retrieved from Pubmed database.

Keith, M. (2012). Surgical treatments to restore function control in spinal cord injury. *Handb Clin Neurol*, 167-179. http://dx.doi.org/10.1016/B978-0-444-52137-8.00010-3

Keller, U. (2015). Robot-assisted arm assessments in spinal cord injured patients: a consideration of concept study. *PLoS One*. http://dx.doi.org/10.1371/journal.pone.0126948

Kennedy, K. (2013). Traumatic versus non-traumatic spinal cord injuries: are there differential rehabilitation outcomes? *Spinal Cord*, *51*(7), 579-583. http://dx.doi.org/10.1038/sc.2013.27

Kesiktas, N. (2012). Turkish adaptation of Spinal Cord Independence Measure--version III. *Int J Rehabil Res*, *35*(1), 88-91. http://dx.doi.org/10.1097/MRR.0b013e32834f402d

Ketchum, J. (2012). Early predictors of employment outcomes 1 year post traumatic brain injury in a population of Hispanic individuals. *NeuroRehabilitation*, *30*(1), 13-22. http://dx.doi.org/10.3233/NRE-2011-0723

Kim, M. (2007). The assessment of walking capacity using the walking index for spinal cord injury: self-selected versus maximal level. *Arch Phys Med Rehabil*, *88*(6), 762-767. http://dx.doi.org/10.1016/j.apmr.2007.03.021

Kingwell, S. (2008). Factors affecting neurological outcome in traumatic conus medullaris and cauda equina injuries. *Neurosurg Focus*, *25*(5). http://dx.doi.org/10.3171/FOC.2008.25.11.E7

Kirshblum, S. (2004). Late neurologic recovery after traumatic spinal cord injury. *Arch Phys Med Rehabil.*, *85*(11), 1811-1817. Retrieved from MEDLINE database.

Kirshblum, S. (2007). Spinal cord injury medicine. 3. Rehabilitation phase after acute spinal cord injury. *Arch Phys Med Rehabil*, 62-70. http://dx.doi.org/10.1016/j.apmr.2006.12.003

Kirshblum, S. (2011). The impact of sacral sensory sparing in motor complete spinal cord injury. *Arch Phys Med Rehabil*, *92*(3), 376-383. http://dx.doi.org/10.1016/j.apmr.2010.07.242

Kisala, P. (2015). Development and psychometric characteristics of the SCI-QOL Pressure Ulcers scale and short form. *J Spinal Cord Med*, *38*(3), 303-314. http://dx.doi.org/10.1179/2045772315Y.0000000017

Kishk, N. (2010). Case control series of intrathecal autologous bone marrow mesenchymal stem cell therapy for chronic spinal cord injury. *Neurorehabil Neural Repair*, *24*(8), 702-708. http://dx.doi.org/10.1177/1545968310369801

Knikou, M. (2012). Plasticity of Corticospinal Neural Control after Locomotor Training in Human Spinal Cord Injury. *Neural Plast*. http://dx.doi.org/10.1155/2012/254948

Koo, D. (2009). Spinal epidural abscess: a 5-year case-controlled review of neurologic outcomes after rehabilitation. *Arch Phys Med Rehabil*, *90*(3), 512-516. http://dx.doi.org/10.1016/j.apmr.2008.09.567

Kortte, K. (2007). The Hopkins Rehabilitation Engagement Rating Scale: development and psychometric properties. *Arch Phys Med Rehabil*, *88*(7), 877-884. http://dx.doi.org/10.1016/j.apmr.2007.03.030

Kovindha, A. (2015). Prevalence of pressure ulcers in Thai wheelchair users with chronic spinal cord injuries. *Spinal Cord*, *53*(10), 767-771. http://dx.doi.org/10.1038/sc.2015.77

Kozlowski, A. (2013). An introduction to applying individual growth curve models to evaluate change in rehabilitation: a National Institute on Disability and Rehabilitation Research Traumatic Brain Injury Model Systems report. *Arch Phys Med Rehabil*, *94*(3), 589-596. http://dx.doi.org/10.1016/j.apmr.2012.08.199

Kramer, J. (2012). Relationship between motor recovery and independence after sensorimotor-complete cervical spinal cord injury. *Neurorehabil Neural Repair*, *26*(9), 1064-1071. http://dx.doi.org/10.1177/1545968312447306

Krassioukov, A. (2003). Medical co-morbidities, secondary complications, and mortality in elderly with acute spinal cord injury. *J Neurotrauma*, *20*(4), 391-399. http://dx.doi.org/10.1089/089771503765172345

Krause, J. (1999). Health behaviors among American Indians with spinal cord injury: comparison with data from the 1996 Behavioral Risk Factor Surveillance System. *Arch Phys Med Rehabil*, *80*(11), 1435-1440. Retrieved from Pubmed database.

Krause, J. (2004). Outcomes after spinal cord injury: comparisons as a function of gender and race and ethnicity. *Arch Phys Med Rehabil*, *85*(3), 355-362. Retrieved from MEDLINE database.

Krause, J. (2006). Racial disparities in health outcomes after spinal cord injury: mediating effects of education and income. *J Spinal Cord Med*, *29*(1), 17-25. Retrieved from Pubmed database.

Krause, J. (2008). Earnings among people with spinal cord injury. *Arch Phys Med Rehabil*, *89*(8), 1474-1481. http://dx.doi.org/10.1016/j.apmr.2007.12.040

Krause, J. (2009). Association of mode of locomotion and independence in locomotion with long-term outcomes after spinal cord injury. *J Spinal Cord Med*, *32*(3), 237-248. Retrieved from Pubmed database.

Krause, J. (2010). Posttraumatic stress disorder and spinal cord injury. *Arch Phys Med Rehabil*, *91*(8), 1182-1187. http://dx.doi.org/10.1016/j.apmr.2010.05.012

Krause, J. (2010). A structural analysis of health outcomes after spinal cord injury. *J Spinal Cord Med*, *33*(1), 22-32. Retrieved from Pubmed database.

Kreutzer, J. (1988). Supported employment and compensatory strategies for enhancing vocational outcome following traumatic brain injury. *Brain Inj*, *2*(3), 205-223. Retrieved from Pubmed database.

Kroll, T. (2008). Rehabilitative needs of individuals with spinal cord injury resulting from gun violence: the perspective of nursing and rehabilitation professionals. *Appl Nurs Res*, *21*(1), 45-49. http://dx.doi.org/10.1016/j.apnr.2006.06.001

Kubota, S. (2013). Feasibility of rehabilitation training with a newly developed wearable robot for patients with limited mobility. *Arch Phys Med Rehabil*, *94*(6), 1080-1087. http://dx.doi.org/10.1016/j.apmr.2012.12.020

Kumar, K. (1997). Deep brain stimulation for intractable pain: a 15-year experience. *Neurosurgery*, *40*(4), 736-746. Retrieved from Pubmed database.

Kuptniratsaikul, V. (2002). The perceived handicap questionnaire: a self perceived handicap measurement in patients with spinal cord injury. *J Med Assoc Thai*, *85*(8), 935-939. Retrieved from Pubmed database.

Kwon, B. (2009). Intrathecal pressure monitoring and cerebrospinal fluid drainage in acute spinal cord injury: a prospective randomized trial. *J Neurosurg Spine*, *10*(3), 181-193. http://dx.doi.org/10.3171/2008.10.SPINE08217

Labruyère, R. (2010). Rehabilitation in spine and spinal cord trauma. *Spine*, 259-262. http://dx.doi.org/10.1097/BRS.0b013e3181f1a979.

Labruyère, R. (2012). Curve walking is not better than straight walking in estimating ambulation-related domains after incomplete spinal cord injury. *Arch Phys Med Rehabil*, *93*(5), 798-801. http://dx.doi.org/10.1016/j.apmr.2011.11.009

Labruyère, R. (2014). Strength training versus robot-assisted gait training after incomplete spinal cord injury: a randomized pilot study in patients depending on walking assistance. *J Neuroeng Rehabi*. http://dx.doi.org/10.1186/1743-0003-11-4

Lam, T. (2011). Using robot-applied resistance to augment body-weight-supported treadmill training in an individual with incomplete spinal cord injury. *Phys Ther*, *91*(1), 143-151. http://dx.doi.org/10.2522/ptj.20100026

Lam, T. (2015). Training with robot-applied resistance in people with motor-incomplete spinal cord injury: Pilot study. *J Rehabil Res Dev*, *52*(1), 113-129. http://dx.doi.org/10.1682/JRRD.2014.03.0090

Lammertse, D. (2005). Neurorehabilitation of spinal cord injuries following lightning and electrical trauma. *NeuroRehabilitation*, *20*(1), 9-14. Retrieved from MEDLINE database.

Lamontagne, M. (2013). Effect of rehabilitation length of stay on outcomes in individuals with traumatic brain injury or spinal cord injury: a systematic review protocol. *Syst Rev*. http://dx.doi.org/10.1186/2046-4053-2-59

Lamothe, G. (2011). . Evolution of spinal cord injuries due to cervical canal stenosis without radiographic evidence of trauma (SCIWORET): a prospective study. *Ann Phys Rehabil Med*, *54*(4), 213-224. http://dx.doi.org/10.1016/j.rehab.2011.02.003

Lannem, A. (2010). Perceptions of exercise mastery in persons with complete and incomplete spinal cord injury. *Spinal Cord*, *48*(5), 388-392. http://dx.doi.org/10.1038/sc.2009.136

Leahy, T. (2010). Impact of a limited trial of walking training using body weight support and a treadmill on the gait characteristics of an individual with chronic, incomplete spinal cord injury. *Physiother Theory Pract*, *26*(7), 483-489. http://dx.doi.org/10.3109/09593980903580225

Lee, B. (2016). Neurological and functional recovery after thoracic spinal cord injury. *J Spinal Cord Med*, *31*(1), 67-76. http://dx.doi.org/10.1179/2045772314Y.0000000280

Lemay, J. (2013). Potential of the smart balance master system to assess standing balance in people with incomplete spinal cord injury. *J Rehabil Med*, *45*(1), 55-60. http://dx.doi.org/10.2340/16501977-1067

Lenehan, B. (2009). Central cord syndrome in Ireland: the effect of age on clinical outcome. *Eur Spine J*, *18*(10), 1458-1463. http://dx.doi.org/10.1007/s00586-009-1107-5

Li, L. (2015). Effects of transplantation of olfactory ensheathing cells in chronic spinal cord injury: a systematic review and meta-analysis. *Eur Spine J*, *24*(5), 919-930. http://dx.doi.org/10.1007/s00586-014-3416-6

Liang, H. (1996). Clinical experience in rehabilitation of spinal cord injury associated with schizophrenia. *Arch Phys Med Rehabil*, *77*(3), 283-286. Retrieved from MEDLINE database.

Lidal, L. (2008). Health-related quality of life in persons with long-standing spinal cord injury. *Spinal Cord*, *46*(11), 710-715. http://dx.doi.org/10.1038/sc.2008.17

Lima, C. (2010). Olfactory mucosal autografts and rehabilitation for chronic traumatic spinal cord injury. *Neurorehabil Neural Repair*, *24*(1), 10-22. http://dx.doi.org/10.1177/1545968309347685

Lin, C. (2011). Traumatic spinal cord injuries in horseback riding: a 35-year review. *Am J Sports Med*, *39*(11), 2441-2446. http://dx.doi.org/10.1177/0363546511419280

Liu, Z. (2011). A new combined therapeutic strategy of governor vessel electro- acupuncture and adult stem cell transplantation promotes the recovery of injured spinal cord. *Curr Med Chem.*, *18*(33), 5165-5171. Retrieved from Pubmed database.

Lo?fvenmark, I. (2016). Outcomes after acute traumatic spinal cord injury in Botswana: from admission to discharge. *Spinal Cord*. http://dx.doi.org/10.1038/sc.2016.122

Lo?fvenmark, I. (2016). Outcomes 2 years after traumatic spinal cord injury in Botswana: a follow-up study. *Spinal Cord*. http://dx.doi.org/10.1038/sc.2016.114

Lorenz, D. (2012). Longitudinal patterns of functional recovery in patients with incomplete spinal cord injury receiving activity-based rehabilitation. *Arch Phys Med Rehabil*, *93*(9), 1541-1552. http://dx.doi.org/10.1016/j.apmr.2012.01.027

Lu, A. (1996). Benefits of rehabilitation for traumatic spinal cord injury: a case report. *J Spinal Cord Med*, *19*(1), 17-19. Retrieved from MEDLINE database.

Lukersmith, S. (2013). Development of clinical guidelines for the prescription of a seated wheelchair or mobility scooter for people with traumatic brain injury or spinal cord injury. *Aust Occup Ther J*, *60*(6), 378-386. http://dx.doi.org/10.1111/1440-1630.12077

Lundgren-Nilsson, A. (2006). Cross-diagnostic validity in a generic instrument: an example from the Functional Independence Measure in Scandinavia. *Health Qual Life Outcomes*. http://dx.doi.org/10.1186/1477-7525-4-55

Lysack, C. (2007). Environmental factors and their role in community integration after spinal cord injury. *Can J Occup The*, 243-254. Retrieved from MEDLINE database.

Macciocchi, S. (2012). Co-occurring traumatic brain injury and acute spinal cord injury rehabilitation outcomes. *Arch Phys Med Rehabil*, *93*(10), 1788-1794. http://dx.doi.org/10.1016/j.apmr.2012.01.022

Macki, M. (2014). Post-surgical thoracic pseudomeningocele causing spinal cord compression. *J Clin Neurosci*, *21*(3), 367-372. http://dx.doi.org/10.1016/j.jocn.2013.05.004

Magasi, S. (2008). Participation Following Traumatic Spinal Cord Injury: An Evidence-Based Review for Research. *J Spinal Cord Med*, *31*(2), 145-156. Retrieved from MEDLINE database.

Manns, P. (1999). Determining the relation between quality of life, handicap, fitness, and physical activity for persons with spinal cord injury. *Arch Phys Med Rehabil*, *80*(12), 1566-1571. Retrieved from MEDLINE database.

Maric, O. (2008). Levodopa therapy in incomplete spinal cord injury. *J Neurotrauma*, *25*(11), 1303-1307. http://dx.doi.org/10.1089/neu.2008.0583

Marinho, A. (2012). Walking-related outcomes for individuals with traumatic and non- traumatic spinal cord injury inform physical therapy practice. *J Spinal Cord Med*, *35*(5), 371-381. http://dx.doi.org/10.1179/2045772312Y.0000000038

Marino, R. (2010). Walking index for spinal cord injury version 2 (WISCI-II) with repeatability of the 10-m walk time: Inter- and intrarater reliabilities. *Am J Phys Med Rehabil*, *89*(1), 7-15. http://dx.doi.org/10.1097/PHM.0b013e3181c560eb

Marino, R. (2011). Upper- and lower-extremity motor recovery after traumatic cervical spinal cord injury: an update from the national spinal cord injury database. *Arch Phys Med Rehabil*, *92*(3), 369-375. http://dx.doi.org/10.1016/j.apmr.2010.09.027

Markandaya, M. (2012). Acute Treatment Options for Spinal Cord Injury. *Curr Treat Options Neurol*. http://dx.doi.org/10.1007/s11940-011-0162-5

Matjaci?, Z. (2007). Apparatus for dynamic balance training during treadmill walking. *J Rehabil Med*, *39*(1), 91-94. http://dx.doi.org/10.2340/16501977-0019

Maynard, F. (1979). Neurological prognosis after traumatic quadriplegia. Three-year experience of California Regional Spinal Cord Injury Care System. *J Neurosurg*, *50*(5), 611-616. http://dx.doi.org/10.3171/jns.1979.50.5.0611

Mazaki, T. (2013). Does laminoplasty really improve neurological status in patients with cervical spinal cord injury without bone and disc injury? A prospective study about neurological recovery and early complications. *Arch Orthop Trauma Surg*, *133*(10), 1401-1405. http://dx.doi.org/10.1007/s00402-013-1810-x

McKinley, W. (1998). Comparison of rehabilitation outcomes in violent versus non- violent traumatic SCI. *J Spinal Cord Med*, *21*(1), 32-36. Retrieved from Pubmed database.

McKinley, W. (1998). Rehabilitation outcome of individuals with nontraumatic myelopathy resulting from spinal stenosis. *J Spinal Cord Med*, *21*(2), 131-136. Retrieved from Pubmed database.

McKinley, W. (1999). Clinical presentations, medical complications, and functional outcomes of individuals with gunshot wound-induced spinal cord injury. *Am J Phys Med Rehabil*, *78*(2), 102-107. Retrieved from Pubmed database.

McKinley, W. (1999). Neoplastic versus traumatic spinal cord injury: an outcome comparison after inpatient rehabilitation. *Arch Phys Med Rehabil*, *80*(10), 1253-1257. Retrieved from Pubmed database.

McKinley, W. (1999). Nontraumatic spinal cord injury: incidence, epidemiology, and functional outcome. *Arch Phys Med Rehabil*, *80*(6), 619-623. Retrieved from Pubmed database.

McKinley, W. (1999). Substance abuse, violence, and outcome after traumatic spinal cord injury. *Am J Phys Med Rehabil*, *78*(4), 306-312. Retrieved from MEDLINE database.

McKinley, W. (2000). Neoplastic vs. traumatic spinal cord injury: an inpatient rehabilitation comparison. *Am J Phys Med Rehabil*, *79*(2), 138-144. Retrieved from Pubmed database.

McKinley, W. (2001). Nontraumatic vs. traumatic spinal cord injury: a rehabilitation outcome comparison. *Am J Phys Med Rehabil*, *80*(9), 693-699. Retrieved from Pubmed database.

Mckinley, W. (2002). Spinal stenosis vs traumatic spinal cord injury: a rehabilitation outcome comparison. *J Spinal Cord Med*, *25*(1), 28-32. Retrieved from Pubmed database.

McKinley, W. (2004). Outcomes of early surgical management versus late or no surgical intervention after acute spinal cord injury. *Arch Phys Med Rehabil.*, *85*(11), 1818-1825. Retrieved from Pubmed database.

McKinley, W. (2007). Incidence and Outcomes of Spinal Cord Injury Clinical Syndromes. *J Spinal Cord Med*, *30*(3), 215-224. Retrieved from MEDLINE database.

McKinley, W. (2008). . Rehabilitation outcomes after infection-related spinal cord disease: a retrospective analysis. *Am J Phys Med Rehabil*, *87*(4), 275-280. http://dx.doi.org/10.1097/PHM.0b013e318168cb6e

McKinley, W. (2011). Comparison of rehabilitation outcomes following vascular- related and traumatic spinal cord injury. *J Spinal Cord Med*, *34*(4), 410-415. http://dx.doi.org/10.1179/2045772311Y.0000000016

McVeigh, S. (2009). Influence of sport participation on community integration and quality of life: a comparison between sport participants and non-sport participants with spinal cord injury. *J Spinal Cord Med*, *32*(2), 115-124. Retrieved from MEDLINE database.

Mehrholz, J. (2008). Locomotor training for walking after spinal cord injury. *Spine*, *33*(21), 68-77. http://dx.doi.org/10.1097/BRS.0b013e3181849747

Mehrholz, J. (2008). Locomotor training for walking after spinal cord injury. *Cochrane Database Syst Rev*, *16*(2). http://dx.doi.org/10.1002/14651858.CD006676.pub2

Menon, N. (2014). Neurogenic bladder following myelopathies: Has it any correlation with neurological and functional recovery? *J Neurosci Rural Pract*. http://dx.doi.org/10.4103/0976-3147.145194

Michailidou, C. (2016). Translation into Greek and initial validity and reliability testing of a modified version of the SCIM III, in both English and Greek, for self-use. *Disabil Rehabil*, *38*(2), 180-188. http://dx.doi.org/10.3109/09638288.2015.1035454

Middleton, J. (1998). Neurological level effect on the discharge functional status of spinal cord injured persons after rehabilitation. *Arch Phys Med Rehabil*, *79*(11), 1428-1432. Retrieved from MEDLINE database.

Middleton, J. (2014). Psychological distress, quality of life, and burden in caregivers during community reintegration after spinal cord injury. *Arch Phys Med Rehabil*, *95*(7), 1312-1319. http://dx.doi.org/10.1016/j.apmr.2014.03.017

Migliorini, C. (2009). Comparison of depression, anxiety and stress in persons with traumatic and non-traumatic post-acute spinal cord injury. *Spinal Cord*, *47*(11), 783-788. http://dx.doi.org/10.1038/sc.2009.43

Milicevic, S. (2014). Analysis of the factors influencing functional outcomes in patients with spinal cord injury. *J Phys Ther Sci*, *26*(1), 67-71. http://dx.doi.org/10.1589/jpts.26.67

Milic?evic?, S. (2012). Demographic characteristics and functional outcomes in patients with traumatic and nontraumatic spinal cord injuries. *Vojnosanit Pregl*, *69*(12), 1061-1066. Retrieved from Pubmed database.

Miller, L. (2016). Health and economic benefits of physical activity for patients with spinal cord injury. *Clinicoecon Outcomes Res*, 551-558. http://dx.doi.org/10.2147/CEOR.S115103

Miller, W. (2008). Measurement properties of the CESD scale among individuals with spinal cord injury. *Spinal Cord*, *46*(4), 287-292. http://dx.doi.org/10.1038/sj.sc.3102127

Miyai, I. (2011). Results of new policies for inpatient rehabilitation coverage in Japan. *Neurorehabil Neural Repair*, *25*(6), 540-547. http://dx.doi.org/10.1177/1545968311402696

Moreh, E. (2009). Spinal decompression sickness presenting as partial Brown-Sequard syndrome and treated with robotic-assisted body-weight support treadmill training. *J Rehabil Med*, *41*(1), 88-89. http://dx.doi.org/10.2340/16501977-0279

Morganti, B. (2005). Walking index for spinal cord injury (WISCI): criterion validation. *Spinal Cord*, *43*(1), 27-33. http://dx.doi.org/10.1038/sj.sc.3101658

Morishita, K. (2009). Patellar tendon reflex as a predictor of improving motor paralysis in complete paralysis due to cervical cord injury. *Spinal Cord*, *47*(8), 640-642. http://dx.doi.org/10.1038/sc.2009.8

Moslavac, S. (2008). Neurological outcome in road traffic accidents with spinal cord injury. *Coll Antropol*, *32*(2), 583-586. Retrieved from MEDLINE database.

Moussavi, R. (2003). Serum levels of vitamins A, C, and E in persons with chronic spinal cord injury living in the community. *Arch Phys Med Rehabil*, *84*(7), 1061-1067. Retrieved from Pubmed database.

Mulcahey, M. (1997). Implanted functional electrical stimulation hand system in adolescents with spinal injuries: an evaluation. *Arch Phys Med Rehabil*, *78*(6), 587-607. Retrieved from MEDLINE database.

Mulcahey, M. (2004). Implantation of the Freehand System during initial rehabilitation using minimally invasive techniques. *Spinal Cord*, *42*(3), 146-155. http://dx.doi.org/10.1038/sj.sc.3101573

Mulcahey, M. (2007). Assessment of upper limb in tetraplegia: considerations in evaluation and outcomes research. *J Rehabil Res Dev*, *44*(1), 91-102. Retrieved from MEDLINE database.

Muller, C. (2013). Emergency closed reduction of a c4/5 fracture dislocation with complete paraplegia resulting in profound neurologic recovery. *Case Rep Orthop*. http://dx.doi.org/10.1155/2013/272865

Musselman, K. (2009). Training of walking skills overground and on the treadmill: case series on individuals with incomplete spinal cord injury. *Phys Ther*, *89*(6), 601-611. http://dx.doi.org/10.2522/ptj.20080257

Musselman, K. (2014). Spinal Cord Injury Functional Ambulation Profile: a preliminary look at responsiveness. *Phys Ther*, *94*(2), 240-250. http://dx.doi.org/10.2522/ptj.20130071

Nam, A. (1996). Rehabilitation challenges in craniospinal injury: two case reports. *Ann Acad Med Singapore*, *25*(6), 873-877. Retrieved from Pubmed database.

Nash, B. (2008). The effects of tone-reducing orthotics on walking of an individual after incomplete spinal cord injury. *J Neurol Phys Ther*, *32*(1), 39-47. http://dx.doi.org/10.1097/NPT.0b013e3181659556

Natale, A. (2009). SCIRehab Project series: the physical therapy taxonomy. *J Spinal Cord Med*, *32*(3), 270-282. Retrieved from Pubmed database.

Nath, M. (1993). Urologic aspects of traumatic central cord syndrome. *J Am Paraplegia Soc*, *16*(3), 160-164. Retrieved from Pubmed database.

Nemunaitis, G. (2016). Early Predictors of Functional Outcome After Trauma. *PM R*, *8*(4), 314-320. http://dx.doi.org/10.1016/j.pmrj.2015.08.007

New, P. (2002). Nontraumatic spinal cord injury: demographic characteristics and complications. *Arch Phys Med Rehabil*, *83*(7), 996-1001. Retrieved from Pubmed database.

New, P. (2011). Comparison of patients managed in specialised spinal rehabilitation units with those managed in non-specialised rehabilitation units. *Spinal Cord*, *49*(8), 909-916. http://dx.doi.org/10.1038/sc.2011.29

New, P. (2011). A population-based study comparing traumatic spinal cord injury and non-traumatic spinal cord injury using a national rehabilitation database. *Spinal Cord*, *49*(3), 397-403. http://dx.doi.org/10.1038/sc.2010.77

New, P. (2015). Neurogenic Bladder and Urodynamic Outcomes in Patients with Spinal Cord Myelopathy. *Top Spinal Cord Inj Rehabil*, *21*(3), 250-256. http://dx.doi.org/10.1310/sci2103-250

Nilsson, A. (2005). Scoring alternatives for FIM in neurological disorders applying Rasch analysis. *Acta Neurol Scand*, *111*(4), 264-273. http://dx.doi.org/10.1111/j.1600-0404.2005.00404.x

Nilsson, S. (2011). Treatment-resistant sensory motor symptoms in persons with SCI may be signs of restless legs syndrome. *Spinal Cord*, *49*(6), 754-756. http://dx.doi.org/10.1038/sc.2010.164

Niu, X. (2014). Prediction of gait recovery in spinal cord injured individuals trained with robotic gait orthosis. *J Neuroeng Rehabil*. http://dx.doi.org/10.1186/1743-0003-11-42

Noonan, V. (2009). A review of instruments assessing participation in persons with spinal cord injury. *Spinal Cord*, *47*(6), 435-446. http://dx.doi.org/10.1038/sc.2008.171

Noonan, V. (2010). Comparing the reliability of five participation instruments in persons with spinal conditions. *J Rehabil Med*, *42*(8), 735-743. http://dx.doi.org/10.2340/16501977-0583

Noreau, L. (2013). Development and assessment of a community follow-up questionnaire for the Rick Hansen spinal cord injury registry. *Arch Phys Med Rehabil*, *94*(9), 1553-1765. http://dx.doi.org/10.1016/j.apmr.2013.03.006

Nott, M. (2014). Effects of concomitant spinal cord injury and brain injury on medical and functional outcomes and community participation. *Top Spinal Cord Inj Rehabil.*, *20*(3), 225-235. http://dx.doi.org/10.1310/sci2003-225

O'Donnell, C. (2013). An outpatient low-intensity locomotor training programme for paediatric chronic incomplete spinal cord injury. *Spinal Cord*, *51*(8), 650-651. http://dx.doi.org/10.1038/sc.2013.23

Ohsawa, S. (2008). Medical rehabilitation of the patients with spinal cord injury caused by aortic aneurysm and its operation. *Spinal Cord*, *46*(2), 150-153. http://dx.doi.org/10.1038/sj.sc.3102075

Olmos, L. (2008). Comparison of gait performance on different environmental settings for patients with chronic spinal cord injury. *Spinal Cord*, *46*(5), 331-334. http://dx.doi.org/10.1038/sj.sc.3102132

Oo, T. (1999). Delayed diaphragm recovery in 12 patients after high cervical spinal cord injury. A retrospective review of the diaphragm status of 107 patients ventilated after acute spinal cord injury. *Spinal Cord*, *37*(2), 117-122. Retrieved from MEDLINE database.

Oteir, A. (2015). Should suspected cervical spinal cord injury be immobilised?: a systematic review. *Injury*, *46*(4), 528-535. http://dx.doi.org/10.1016/j.injury.2014.12.032

Ottomanelli, L. (2013). A prospective examination of the impact of a supported employment program and employment on health-related quality of life, handicap, and disability among Veterans with SCI. *Qual Life Res*, *22*(8), 2133-2141. http://dx.doi.org/10.1007/s11136-013-0353-5

Ozelie, R. (2009). SCIRehab Project series: the occupational therapy taxonomy. *J Spinal Cord Med*, *32*(3), 283-297. Retrieved from Pubmed database.

Page, S. (2007). An electric stimulation cycling protocol for gait in incomplete spinal cord injury. *Arch Phys Med Rehabil*, *88*(6), 798-800. http://dx.doi.org/10.1016/j.apmr.2007.03.019

Pagliacci, M. (2003). Spinal cord lesion management in Italy: a 2-year survey. *Spinal Cord*, *41*(11), 620-628. http://dx.doi.org/10.1038/sj.sc.3101521

Pajareya, K. (1998). Functional skills after rehabilitation for patients with spinal cord injury. *J Med Assoc Thai*, *81*(5), 310-315. Retrieved from MEDLINE database.

Panisset, M. (2016). Does early exercise attenuate muscle atrophy or bone loss after spinal cord injury? *Spinal Cord*, *54*(2), 84-92. http://dx.doi.org/10.1038/sc.2015.150

Parker, N. (2011). Comparison of the coping strategies, anxiety, and depression in a group of Turkish spinal cord injured patients and their family caregivers in a rehabilitation center. *Eur J Phys Rehabil Med*, *47*(4), 595-600. Retrieved from MEDLINE database.

Pastor, D. (2010). Use of electrical stimulation and exercise to increase muscle strength in a patient after surgery for cervical spondylotic myelopathy. *Physiother Theory Pract*, *26*(2), 134-142. http://dx.doi.org/10.3109/09593980902750915

Patrick, M. (2011). Consumer preference in ranking walking function utilizing the walking index for spinal cord injury II. *Spinal Cord*, *49*(12), 1164-1172. http://dx.doi.org/10.1038/sc.2011.77

Pavese, C. (2016). Prediction of Bladder Outcomes after Traumatic Spinal Cord Injury: A Longitudinal Cohort Study. *PLoS Med*, *13*(6). http://dx.doi.org/10.1371/journal.pmed.1002041

Pérez-de la Cruz, S. (2015). Spinal cord injury in pediatric age in Spain. Reality of a national reference center. *Childs Nerv Syst*, *31*(6), 917-921. http://dx.doi.org/10.1007/s00381-015-2681-y

Pershouse, K. (2012). Investigating changes in quality of life and function along the lifespan for people with spinal cord injury. *Arch Phys Med Rehabil*, *93*(3), 413-419. http://dx.doi.org/10.1016/j.apmr.2011.10.014

Pezzin, L. (2000). Rehabilitation and the long-term outcomes of persons with trauma-related amputations. *Arch Phys Med Rehabil*, *81*(3), 292-300. Retrieved from Pubmed database.

Pollard, P. (2003). Factors associated with improved neurologic outcomes in patients with incomplete tetraplegia. *Spine*, *28*(1), 33-39. http://dx.doi.org/10.1097/01.BRS.0000038180.84128.C4

Poncumhak, P. (2013). Reliability and validity of three functional tests in ambulatory patients with spinal cord injury. *Spinal Cord*, *51*(3), 214-217. http://dx.doi.org/10.1038/sc.2012.126

Poncumhak, P. (2014). Ability of walking without a walking device in patients with spinal cord injury as determined using data from functional tests. *J Spinal Cord Med*, *37*(4), 389-396. http://dx.doi.org/10.1179/2045772313Y.0000000160

Popovic, M. (2006). Functional electrical therapy: retraining grasping in spinal cord injury. *Spinal Cord*, *44*(3), 143-151. http://dx.doi.org/10.1038/sj.sc.3101822

Popovic, M. (2011). Functional electrical stimulation therapy of voluntary grasping versus only conventional rehabilitation for patients with subacute incomplete tetraplegia: a randomized clinical trial. *Neurorehabil Neural Repair*, *25*(5), 433-442. http://dx.doi.org/10.1177/1545968310392924

Posluszny, J. (2014). Multicenter review of diaphragm pacing in spinal cord injury: successful not only in weaning from ventilators but also in bridging to independent respiration. *J Trauma Acute Care Surg*, *76*(2), 303-309. http://dx.doi.org/10.1097/TA.0000000000000112

Post, M. (2005). Duration and functional outcome of spinal cord injury rehabilitation in the Netherlands. *J Rehabil Res Dev*, 75-85. Retrieved from MEDLINE database.

Pouw, M. (2011). Diagnostic criteria of traumatic central cord syndrome. Part 3: descriptive analyses of neurological and functional outcomes in a prospective cohort of traumatic motor incomplete tetraplegics. *Spinal Cord*, *49*(5), 614-622. http://dx.doi.org/10.1038/sc.2010.171

Powell, E. (2016). Transvertebral direct current stimulation paired with locomotor training in chronic spinal cord injury: A case study. *NeuroRehabilitation*, *38*(1), 27-35. http://dx.doi.org/10.3233/NRE-151292

Pramodhyakul, W. (2013). Immediate effects of obstacle crossing training in independent ambulatory patients with spinal cord injury. *Spinal Cord*, *51*(5), 379-383. http://dx.doi.org/10.1038/sc.2012.178

Pretz, C. (2014). Using Rasch motor FIM individual growth curves to inform clinical decisions for persons with paraplegia. *Spinal Cord*, *52*(9), 671-676. http://dx.doi.org/10.1038/sc.2014.94

Prosser, L. (2007). Locomotor training within an inpatient rehabilitation program after pediatric incomplete spinal cord injury. *Phys Ther*, *87*(92), 1224-1232. http://dx.doi.org/10.2522/ptj.20060252

Protas, E. (2001). Supported treadmill ambulation training after spinal cord injury: a pilot study. *Arch Phys Med Rehabil*, *82*(6), 825-831. http://dx.doi.org/10.1053/apmr.2001.23198

Putz, C. (2011). The effect of polytrauma as a possible confounder in the outcome of monotraumatic vs polytraumatic paraplegic patients: a clinical cohort study. *Spinal Cord*, *49*(6), 721-727. http://dx.doi.org/10.1038/sc.2010.181

Putz, C. (2011). Neurological and functional recovery in multiple injured patients with paraplegia: outcome after 1 year. *J Trauma*, *70*(5), 1078-1085. http://dx.doi.org/10.1097/TA.0b013e3181e73fa0

Putzke, J. (2001). Nursing home residence: quality of life among individuals with spinal cord injury. *Am J Phys Med Rehabil.*, *80*(6), 404-409. Retrieved from MEDLINE database.

Putzke, J. (2001). Quality of life after spinal cord injury caused by gunshot. *Arch Phys Med Rehabil*, *82*(7), 949-954. http://dx.doi.org/10.1053/apmr.2001.23973

Putzke, J. (2002). Predictors of life satisfaction: a spinal cord injury cohort study. *Arch Phys Med Rehabil*, *83*(4), 555-561. Retrieved from Pubmed database.

Putzke, J. (2003). Age and spinal cord injury: an emphasis on outcomes among the elderly. *J Spinal Cord Med*, *26*(1), 37-44. Retrieved from Pubmed database.

Qu, H. (2011). Impact of Medicare prospective payment system on acute rehabilitation outcomes of patients with spinal cord injury. *Arch Phys Med Rehabil.*, *92*(3), 346-351. http://dx.doi.org/10.1016/j.apmr.2010.07.236

Raithatha, R. (2016). Non-invasive brain stimulation and robot-assisted gait training after incomplete spinal cord injury: A randomized pilot study. *NeuroRehabilitation*, *38*(1), 215-225. http://dx.doi.org/10.3233/NRE-151291

Ramakrishnan, K. (2011). Return to work after spinal cord injury in Malaysia. *Spinal Cord*, *49*(7), 812-816. http://dx.doi.org/10.1038/sc.2010.186

Rao, Y. (2013). Clinical application of olfactory ensheathing cells in the treatment of spinal cord injury. *J Int Med Res*, *41*(2), 473-481. http://dx.doi.org/10.1177/0300060513476426

Rhodes, L. (2015). A multidisciplinary approach to providing care to adolescents with spinal cord trauma resulting from all-terrain vehicle accidents. *J Trauma Nurs*, *22*(1), 23-27. http://dx.doi.org/10.1097/JTN.0000000000000099

Riberto, M. (2014). Validation of the Brazilian version of the Spinal Cord Independence Measure III. *Arq Neuropsiquiatr*, *72*(6), 439-444. Retrieved from MEDLINE database.

Rice, L. (2014). Impact of a wheelchair education protocol based on practice guidelines for preservation of upper-limb function: a randomized trial. *Arch Phys Med Rehabil*, *95*(1), 10-19. http://dx.doi.org/10.1016/j.apmr.2013.06.028

Richards, J. (1999). Access to the environment and life satisfaction after spinal cord injury. *Arch Phys Med Rehabil*, *80*(11), 1501-1506. Retrieved from MEDLINE database.

Riggins, M. (2011). The relationship between quality of life and change in mobility 1 year postinjury in individuals with spinal cord injury. *Arch Phys Med Rehabil*, *92*(7), 1027-1033. http://dx.doi.org/10.1016/j.apmr.2011.02.010

Riordan, A. (2015). Psychosocial outcomes among youth with spinal cord injury by neurological impairment. *J Spinal Cord Med*, *38*(1), 76-83. http://dx.doi.org/10.1179/2045772313Y.0000000162

Roach, M. (2011). Cell telephone ownership and social integration in persons with spinal cord injury. *Arch Phys Med Rehabil*, *92*(3), 472-476. http://dx.doi.org/10.1016/j.apmr.2010.09.030

Ronen, J. (2004). Length of stay in hospital following spinal cord lesions in Israel. *Spinal Cord*, *42*(6), 353-358. http://dx.doi.org/10.1038/sj.sc.3101590

Roth, E. (1990). Traumatic central cord syndrome: clinical features and functional outcomes. *Arch Phys Med Rehabil*, *71*(1), 18-23. Retrieved from Pubmed database.

Roth, E. (1991). Traumatic cervical Brown-Sequard and Brown-Sequard-plus syndromes: the spectrum of presentations and outcomes. *Paraplegia*, *29*(9), 582-589. http://dx.doi.org/10.1038/sc.1991.86

Rudhe, C. (2009). Upper extremity function in persons with tetraplegia: relationships between strength, capacity, and the spinal cord independence measure. *Neurorehabil Neural Repair*, *23*(5), 413-421. http://dx.doi.org/10.1177/1545968308331143

Rudhe, C. (2012). Reliability of movement workspace measurements in a passive arm orthosis used in spinal cord injury rehabilitation. *J Neuroeng Rehabil*. http://dx.doi.org/10.1186/1743-0003-9-37

Rundquist, J. (2011). The SCIRehab project: treatment time spent in SCI rehabilitation. Nursing bedside education and care management time during inpatient spinal cord injury rehabilitation. *J Spinal Cord Med*, *34*(2), 205-215. http://dx.doi.org/10.1179/107902611X12971826988255

Rupp, R. (2015). Safety and Efficacy of At-Home Robotic Locomotion Therapy in Individuals with Chronic Incomplete Spinal Cord Injury: A Prospective, Pre-Post Intervention, Proof-of-Concept Study. *PLoS One*, *10*(3). http://dx.doi.org/10.1371/journal.pone.0119167

Ryan, T. (2013). Case report: endurance electrical stimulation training improves skeletal muscle oxidative capacity in chronic spinal cord injury. *Arch Phys Med Rehabil*, *94*(12), 2559-2561. http://dx.doi.org/10.1016/j.apmr.2013.06.014

Saberi, H. (2014). Comparison of neurological and functional outcomes after administration of granulocyte-colony-stimulating factor in motor-complete versus motor-incomplete postrehabilitated, chronic spinal cord injuries: a phase I/II study. *Cell Transplant*, 19-23. http://dx.doi.org/10.3727/096368914X684943

Sacco, K. (2011). A combined robotic and cognitive training for locomotor rehabilitation: evidences of cerebral functional reorganization in two chronic traumatic brain injured patients. *Front Hum Neurosci*. http://dx.doi.org/10.3389/fnhum.2011.00146

Saensook, W. (2014). Discriminative ability of the three functional tests in independent ambulatory patients with spinal cord injury who walked with and without ambulatory assistive devices. *J Spinal Cord Med*, *37*(2), 212-217. http://dx.doi.org/10.1179/2045772313Y.0000000139

Sakel, M. (2015). Does anticholinergics drug burden relate to global neuro- disability outcome measures and length of hospital stay? *Brain Inj*, *29*(12), 1426-1430. http://dx.doi.org/10.3109/02699052.2015.1060358

Sale, P. (2016). Effects on mobility training and de-adaptations in subjects with Spinal Cord Injury due to a Wearable Robot: a preliminary report. *BMC Neurol*. http://dx.doi.org/10.1186/s12883-016-0536-0

Saltzman, J. (2013). Neurotoxic or Neuroprotective? Current Controversies in SCI- Induced Autoimmunity. *Curr Phys Med Rehabil Rep*, *1*(3). http://dx.doi.org/10.1007/s40141-013-0021-2

Salvin, M. (2016). Spinal Cord Injury-Functional Index/Assistive Technology Short Forms. *Arch Phys Med Rehabil*, *97*(10), 1745-1754. http://dx.doi.org/10.1016/j.apmr.2016.03.029

Samuelkamaleshkumar, S. (2010). Community reintegration in rehabilitated South Indian persons with spinal cord injury. *Arch Phys Med Rehabil*, *91*(7), 1117-1121. http://dx.doi.org/10.1016/j.apmr.2010.04.005

Sattar, A. (2014). Predictors of functional outcome in patients with traumatic spinal cord injury after inpatient rehabilitation: in Saudi Arabia. *NeuroRehabilitation*, *35*(2), 341-347. http://dx.doi.org/10.3233/NRE-141111

Sawatzky, B. (2007). The segway personal transporter as an alternative mobility device for people with disabilities: a pilot study. *Arch Phys Med Rehabil*, *88*(11), 1423-1428. http://dx.doi.org/10.1016/j.apmr.2007.08.005

Scheel-Sailer, A. (2013). Prevalence, location, grade of pressure ulcers and association with specific patient characteristics in adult spinal cord injury patients during the hospital stay: a prospective cohort study. *Spinal Cord*, *51*(11), 828-833. http://dx.doi.org/10.1038/sc.2013.91

Scherer, M. (2000). Predicting satisfaction with assistive technology for a sample of adults with new spinal cord injuries. *Psychol Rep*, 981-987. http://dx.doi.org/10.2466/pr0.2000.87.3.981

Scherer, M. (2001). Measuring subjective quality of life following spinal cord injury: a validation study of the assistive technology device predisposition assessment. *Disabil Rehabil*, *23*(9), 387-393. Retrieved from MEDLINE database.

Schottler, J. (2010). Patient and caregiver knowledge of severity of injury among youth with spinal cord injury. *Spinal Cord*, *48*(1), 34-38. http://dx.doi.org/10.1038/sc.2009.74

Schönher, M. (1999). Functional outcome of patients with spinal cord injury: rehabilitation outcome study. *Clin Rehabil*, *13*(6), 457-463. Retrieved from MEDLINE database.

Schwartz, I. (2007). Rehabilitation outcomes of terror victims with multiple traumas. *Arch Phys Med Rehabil*, *88*(4), 440-448. http://dx.doi.org/10.1016/j.apmr.2007.01.001

Schwartz, I. (2011). Locomotor training using a robotic device in patients with subacute spinal cord injury. *Spinal Cord*, *49*(10), 1062-1067. http://dx.doi.org/10.1038/sc.2011.59

Scivoletto, G. (2003). Effects on age on spinal cord lesion patients' rehabilitation. *Spinal Cord*, *41*(8), 457-464. http://dx.doi.org/10.1038/sj.sc.3101489

Scivoletto, G. (2004). Sex-related differences of rehabilitation outcomes of spinal cord lesion patients. *Clin Rehabil*, *18*(6), 709-713. Retrieved from Pubmed database.

Scivoletto, G. (2005). Early versus delayed inpatient spinal cord injury rehabilitation: an Italian study. *Arch Phys Med Rehabil*, *86*(3), 512-516. http://dx.doi.org/10.1016/j.apmr.2004.05.021

Scivoletto, G. (2006). Utility of delayed spinal cord injury rehabilitation: an Italian study. *Neurol Sci*, *27*(2), 86-90. http://dx.doi.org/10.1007/s10072-006-0605-z

Scivoletto, G. (2008). Inflammatory myelopathies and traumatic spinal cord lesions: comparison of functional and neurological outcomes. *Phys Ther*, *88*(4), 471-484. http://dx.doi.org/10.2522/ptj.20070049

Scivoletto, G. (2011). Neoplastic myelopathies and traumatic spinal cord lesions: an Italian comparison of functional and neurological outcomes. *Spinal Cord*, *49*(7), 799-805. http://dx.doi.org/10.1038/sc.2011.6

Scivoletto, G. (2011). Recovery following ischemic myelopathies and traumatic spinal cord lesions. *Spinal Cord*, *49*(8), 897-902. http://dx.doi.org/10.1038/sc.2011.31

Scivoletto, G. (2011). Traumatic and non-traumatic spinal cord lesions: an Italian comparison of neurological and functional outcomes. *Spinal Cord*, *49*(3), 391-396. http://dx.doi.org/10.1038/sc.2010.85

Scivoletto, G. (2011). Validity and reliability of the 10-m walk test and the 6-min walk test in spinal cord injury patients. *Spinal Cord*, *49*(6), 736-740. http://dx.doi.org/10.1038/sc.2010.180

Scivoletto, G. (2013). Impact of multiple injuries on functional and neurological outcomes of patients with spinal cord injury. *Scand J Trauma Resusc Emerg Med*, 21-42. http://dx.doi.org/10.1186/1757-7241-21-42

Scivoletto, G. (2013). The spinal cord independence measure: how much change is clinically significant for spinal cord injury subjects. *Disabil Rehabil*, *35*(21), 1808-1813. http://dx.doi.org/10.3109/09638288.2012.756942

Sczesny-Kaiser, M. (2015). HAL® exoskeleton training improves walking parameters and normalizes cortical excitability in primary somatosensory cortex in spinal cord injury patients. *J Neuroeng Rehabil*. http://dx.doi.org/10.1186/s12984-015-0058-9

Sekaran, P. (2010). Community reintegration of spinal cord-injured patients in rural south India. *Spinal Cord*, *48*(8), 628-632. http://dx.doi.org/10.1038/sc.2010.6

Senthilvelkumar, T. (2015). Comparison of body weight-supported treadmill training versus body weight-supported overground training in people with incomplete tetraplegia: a pilot randomized trial. *Clin Rehabil*, *29*(1), 42-49. http://dx.doi.org/10.1177/0269215514538068

Shavelle, R. (2015). Mobility, continence, and life expectancy in persons with Asia Impairment Scale Grade D spinal cord injuries. *Am J Phys Med Rehabil*, *94*(3), 180-191. <http://dx.doi.org/10.1097/PHM.0000000000000140>

Sherman, AL. (1997). *Arch Phys Med Rehabil*, *78*(9). Retrieved from Pubmed database.

Sherman, A. (1997). Management of traumatic optic neuropathy with coexistent spinal cord injury: a case report. *Arch Phys Med Rehabil*, *78*(9), 1012-1014. Retrieved from Pubmed database.

Singh, P. (2016). Management of pediatric single-level vertebral hemangiomas presenting with myelopathy by three-pronged approach (ethanol embolization, laminectomy, and instrumentation): a single-institute experience. *Childs Nerv Syst*, *32*(2), 307-314. http://dx.doi.org/10.1007/s00381-015-2941-x

Sipsk, M. (2004). Effects of gender on neurologic and functional recovery after spinal cord injury. *Arch Phys Med Rehabil.*, *85*(11), 1826-1836. Retrieved from MEDLINE database.

Skelton, F. (2015). Examining health-care utilization in the first year following spinal cord injury. *J Spinal Cord Med*, *38*(6), 690-695. http://dx.doi.org/10.1179/2045772314Y.0000000269

Spiess, M. (2012). Unexpected recovery after robotic locomotor training at physiologic stepping speed: a single-case design. *Arch Phys Med Rehabil.*, *93*(8), 1476-1484. http://dx.doi.org/10.1016/j.apmr.2012.02.030

Spooren, A. (2006). Measuring change in arm hand skilled performance in persons with a cervical spinal cord injury: responsiveness of the Van Lieshout Test. *Spinal Cord*, *44*(12), 772-779. http://dx.doi.org/10.1038/sj.sc.3101957

Spooren, A. (2008). Rehabilitation outcome of upper extremity skilled performance in persons with cervical spinal cord injuries. *J Rehabil Med*, *40*(8), 637-644. http://dx.doi.org/10.2340/16501977-0231

Spooren, A. (2011). Evaluation of a task-oriented client-centered upper extremity skilled performance training module in persons with tetraplegia. *Spinal Cord*, *49*(10), 1049-1054. http://dx.doi.org/10.1038/sc.2011.54

Steeves, J. (2011). Extent of spontaneous motor recovery after traumatic cervical sensorimotor complete spinal cord injury. *Spinal Cord*, *49*(2), 257-265. http://dx.doi.org/10.1038/sc.2010.99

Stenson, K. (2011). Obesity and inpatient rehabilitation outcomes for patients with a traumatic spinal cord injury. *Arch Phys Med Rehabil*, *92*(3), 384-390. http://dx.doi.org/10.1016/j.apmr.2010.07.235

Stineman, M. (1999). A functional strategy for classifying patients after traumatic spinal cord injury. *Spinal Cord*, *37*(10), 717-725. Retrieved from Pubmed database.

Stocchetti, N. (2016). Chronic impact of traumatic brain injury on outcome and quality of life: a narrative review. *Crit Care*, *20*(1). http://dx.doi.org/10.1186/s13054-016-1318-1

Strut, R. (2009). Walking ability at discharge from inpatient rehabilitation in a cohort of non-traumatic spinal cord injury patients. *Spinal Cord*, *47*(10), 763-768. http://dx.doi.org/10.1038/sc.2009.36

Sumida, M. (2001). Early rehabilitation effect for traumatic spinal cord injury. *Arch Phys Med Rehabil.*, *82*(3), 391-395. http://dx.doi.org/10.1053/apmr.2001.19780

Sun, C. (2011). Apolipoprotein E epsilon 4 allele and outcomes of traumatic spinal cord injury in a Chinese Han population. *Mol Biol Rep*, *38*(7), 4793-4796. http://dx.doi.org/10.1007/s11033-010-0620-2

Suzuki, T. (2005). Development of a novel type of shoe to improve the efficiency of knee-ankle-foot orthoses with a medial single hip joint (Primewalk orthoses): a novel type of shoe for Primewalk orthosis. *Prosthet Orthot Int*, *29*(3), 303-311. Retrieved from MEDLINE database.

Takao, T. (2016). Clinical Influence of Cervical Spinal Canal Stenosis on Neurological Outcome after Traumatic Cervical Spinal Cord Injury without Major Fracture or Dislocation. *Asian Spine J*, *10*(3), 536-542. http://dx.doi.org/10.4184/asj.2016.10.3.536

Tamburella, F. (2013). Balance training improves static stability and gait in chronic incomplete spinal cord injury subjects: a pilot study. *Eur J Phys Rehabil Med*, *49*(3), 353-364. Retrieved from MEDLINE database.

Tate, D. (1994). Determining differences in post discharge outcomes among catastrophically and noncatastrophically sponsored outpatients with spinal cord injury. *Am J Phys Med Rehabil*, *73*(2), 89-97. Retrieved from MEDLINE database.

Taylor, S. (2015). Patterns in Wheeled Mobility Skills Training, Equipment Evaluation, and Utilization: Findings from the SCIRehab Project. *Assist Technol*, *27*(2), 59-68. http://dx.doi.org/10.1080/10400435.2014.978511

Tederko, P. (2009). Strategies for neuroprotection following spinal cord injury. *Ortop Traumatol Rehabil*, *11*(2), 103-110. Retrieved from Pubmed database.

Teeter, L. (2012). Relationship of physical therapy inpatient rehabilitation interventions and patient characteristics to outcomes following spinal cord injury: The SCIRehab project. *J Spinal Cord Med*, *35*(6), 503-526. http://dx.doi.org/10.1179/2045772312Y.0000000058

Teo, S. (2011). Health of people with spinal cord injury in Singapore: implications for rehabilitation planning and implementation. *Disabil Rehabil*, 1460-1474. http://dx.doi.org/10.3109/09638288.2010.533812

Theriault, E. (2014). Antispasmodic medications may be associated with reduced recovery during inpatient rehabilitation after traumatic spinal cord injury. *J Spinal Cord Med*, 1-9. http://dx.doi.org/10.1080/10790268.2016.1245010

Thomas, S. (2005). Increases in corticospinal tract function by treadmill training after incomplete spinal cord injury. *J Neurophysiol*, *94*(4), 2844-2855. http://dx.doi.org/10.1152/jn.00532.2005

Thompson, C. (2015). Hyperextension injury of the cervical spine with central cord syndrome. *Eur Spine J*, *24*(1), 195-202. http://dx.doi.org/10.1007/s00586-014-3432-6

Tian, W. (2013). Role of body weight in therapy participation and rehabilitation outcomes among individuals with traumatic spinal cord injury. *Arch Phys Med Rehabil*, 125-136. http://dx.doi.org/10.1016/j.apmr.2012.10.039

Tooth, L. (2003). Rehabilitation outcomes in traumatic spinal cord injury in Australia: functional status, length of stay and discharge setting. *Spinal Cord*, *41*(4), 220-230. http://dx.doi.org/10.1038/sj.sc.3101433

Tramonti, F. (2014). Individualised and health-related quality of life of persons with spinal cord injury. *Spinal Cord*, *52*(3), 231-235. http://dx.doi.org/10.1038/sc.2013.156

Tsai, I. (2014). The association of assistive mobility devices and social participation in people with spinal cord injuries. *Spinal Cord*, *52*(3), 209-215. http://dx.doi.org/10.1038/sc.2013.178

Tulsky, D. (2011). Developing a contemporary patient-reported outcomes measure for spinal cord injury. *Arch Phys Med Rehabil*, 44-51. http://dx.doi.org/10.1016/j.apmr.2011.04.024

Tulsky, D. (2012). Spinal cord injury-functional index: item banks to measure physical functioning in individuals with spinal cord injury. *Arch Phys Med Rehabil*, *93*(10), 1722-1732. http://dx.doi.org/10.1016/j.apmr.2012.05.007

Tulsky, D. (2015). Development and psychometric characteristics of the SCI-QOL Bladder Management Difficulties and Bowel Management Difficulties item banks and short forms and the SCI-QOL Bladder Complications scale. *J Spinal Cord Med*, *38*(3), 288-302. http://dx.doi.org/10.1179/2045772315Y.0000000030

Tulsky, D. (2015). Methodology for the development and calibration of the SCI- QOL item banks. *J Spinal Cord Med*, *38*(3), 270-287. http://dx.doi.org/10.1179/2045772315Y.0000000034

Tulsky, D. (2015). Overview of the Spinal Cord Injury--Quality of Life (SCI-QOL) measurement system. *J Spinal Cord Med*, *38*(3), 257-269. http://dx.doi.org/10.1179/2045772315Y.0000000023

Uchikawa, K. (2007). A washing toilet seat with a CCD camera monitor to stimulate bowel movement in patients with spinal cord injury. *Am J Phys Med Rehabil*, *86*(3), 200-204. http://dx.doi.org/10.1097/PHM.0b013e3180320edf

Unalan, H. (2015). Validity and reliability study of the Turkish version of Spinal Cord Independence Measure-III. *Spinal Cord*, *53*(6), 455-460. http://dx.doi.org/10.1038/sc.2014.249

Vaccaro, A. (1997). Neurologic outcome of early versus late surgery for cervical spinal cord injury. *Spine*, *15*(22), 2609-2613. Retrieved from Pubmed database.

van Hedel, H. (2005). Assessing walking ability in subjects with spinal cord injury: validity and reliability of 3 walking tests. *Arch Phys Med Rehabil*, *86*(2), 190-196. http://dx.doi.org/10.1016/j.apmr.2004.02.010

van Hedel, H. (2006). Fighting for each segment: estimating the clinical value of cervical and thoracic segments in SCI. *J Neurotrauma*, *23*(11), 1621-1631. http://dx.doi.org/10.1089/neu.2006.23.1621

van Hedel, H. (2006). Improving walking assessment in subjects with an incomplete spinal cord injury: responsiveness. *Spinal Cord*, *44*(6), 352-356. http://dx.doi.org/10.1038/sj.sc.3101853

van Hedel, H. (2007). Assessment of walking speed and distance in subjects with an incomplete spinal cord injury. *Neurorehabil Neural Repair*, *21*(4), 295-301. http://dx.doi.org/10.1177/1545968306297861

van Hedel, H. (2008). Standardized assessment of walking capacity after spinal cord injury: the European network approach. *Neurol Res*, *30*(1), 61-73. http://dx.doi.org/10.1179/016164107X230775

van Hedel, H. (2009). Gait speed in relation to categories of functional ambulation after spinal cord injury. *Neurorehabil Neural Repair*, *23*(4), 343-350. http://dx.doi.org/10.1177/1545968308324224

van Hedel, H. (2009). Walking during daily life can be validly and responsively assessed in subjects with a spinal cord injury. *Neurorehabil Neural Repair*, *23*(2), 117-124. http://dx.doi.org/10.1177/1545968308320640

van Hedel, H. (2010). Rehabilitation of locomotion after spinal cord injury. *Restor Neurol Neurosci*, *28*(1), 123-134. http://dx.doi.org/10.3233/RNN-2010-0508

van Hedel, H. (2011). Mismatch between investigator-determined and patient-reported independence after spinal cord injury: consequences for rehabilitation and trials. *Neurorehabil Neural Repair*, *25*(9), 855-864. http://dx.doi.org/10.1177/1545968311407518

van Koppenhagen, C. (2014). Longitudinal relationship between wheelchair exercise capacity and life satisfaction in patients with spinal cord injury: A cohort study in the Netherlands. *J Spinal Cord Med*, *37*(3), 328-337. http://dx.doi.org/10.1179/2045772313Y.0000000167

van Middendorp, J. (2011). A clinical prediction rule for ambulation outcomes after traumatic spinal cord injury: a longitudinal cohort study. *Lancet*, 1004-1010. http://dx.doi.org/10.1016/S0140-6736(10)62276-3

van Middendorp, J. (2011). Diagnosis and prognosis of traumatic spinal cord injury. *Global Spine J*, 1-8. http://dx.doi.org/10.1055/s-0031-1296049

Vanmulken, D. (2015). Robot-assisted task-oriented upper extremity skill training in cervical spinal cord injury: a feasibility study. *Spinal Cord*, *53*(7), 547-551. http://dx.doi.org/10.1038/sc.2014.250

Varoqui, D. (2014). Ankle voluntary movement enhancement following robotic-assisted locomotor training in spinal cord injury. *J Neuroeng Rehabil*. http://dx.doi.org/10.1186/1743-0003-11-46

Velstra, I. (2014). Prediction and stratification of upper limb function and self-care in acute cervical spinal cord injury with the graded redefined assessment of strength, sensibility, and prehension (GRASSP). *Neurorehabil Neural Repair.*, *28*(7), 632-642. http://dx.doi.org/10.1177/1545968314521695

Vervoordeldonk, J. (2013). Rehabilitation of patients with nontraumatic spinal cord injury in the Netherlands: etiology, length of stay, and functional outcome. *Top Spinal Cord Inj Rehabil*, *19*(3), 195-201. http://dx.doi.org/10.1310/sci1903-195

Villiger, M. (2013). Virtual reality-augmented neurorehabilitation improves motor function and reduces neuropathic pain in patients with incomplete spinal cord injury. *Neurorehabil Neural Repair*, *27*(8), 675-683. http://dx.doi.org/10.1177/1545968313490999

Villiger, M. (2015). Relationship between structural brainstem and brain plasticity and lower-limb training in spinal cord injury: a longitudinal pilot study. *Front Hum Neurosci*. http://dx.doi.org/10.3389/fnhum.2015.00254

Vogel, L. (2007). Ambulation in Children and Youth With Spinal Cord Injuries. *J Spinal Cord Med*, 158-164. Retrieved from MEDLINE database.

Vogel, L. (2011). Long-term outcomes of adults with pediatric-onset spinal cord injuries as a function of neurological impairment. *J Spinal Cord Med*, *34*(1), 60-66. http://dx.doi.org/10.1179/107902610X12883422813787

Wagner, A. (2014). A Rehabilomics framework for personalized and translational rehabilitation research and care for individuals with disabilities: Perspectives and considerations for spinal cord injury. *J Spinal Cord Med*, *37*(5), 493-502. http://dx.doi.org/10.1179/2045772314Y.0000000248

Walker, N. (2003). Measuring participation across impairment groups using the Craig Handicap Assessment Reporting Technique. *Am J Phys Med Rehabil*, *82*(12), 936-941. http://dx.doi.org/10.1097/01.PHM.0000098041.42394.9A

Wall, T. (2015). The effects of the Nintendo™ Wii Fit on gait, balance, and quality of life in individuals with incomplete spinal cord injury. *J Spinal Cord Med*, *38*(6), 777-783. http://dx.doi.org/10.1179/2045772314Y.0000000296

Waters, R. (1998). Postrehabilitation outcomes after spinal cord injury caused by firearms and motor vehicle crash among ethnically diverse groups. *Arch Phys Med Rehabil*, *79*(10), 1237-1243. Retrieved from MEDLINE database.

Weeks, D. (2011). Association of antidepressant medication therapy with inpatient rehabilitation outcomes for stroke, traumatic brain injury, or traumatic spinal cord injury. *Arch Phys Med Rehabil*, *92*(5), 683-695. http://dx.doi.org/10.1016/j.apmr.2010.12.026

Werhagen, L. (2012). 25 years or more after spinal cord injury: clinical conditions of individuals in the Florence and Stockholm areas. *Spinal Cord*, *50*(3), 243-246. http://dx.doi.org/10.1038/sc.2011.130

Whiteneck, G. (1992). Quantifying handicap: a new measure of long-term rehabilitation outcomes. *Arch Phys Med Rehabil*, *73*(6), 519-526. Retrieved from MEDLINE database.

Whiteneck, G. (1999). Predicting community reintegration after spinal cord injury from demographic and injury characteristics. *Arch Phys Med Rehabil*, *80*(11), 1485-1491. Retrieved from MEDLINE database.

Whiteneck, G. (2004). Environmental factors and their role in participation and life satisfaction after spinal cord injury. *Arch Phys Med Rehabil*, *85*(11), 1793-1803. Retrieved from MEDLINE database.

Whiteneck, G. (2013). SCIRehab uses practice-based evidence methodology to associate patient and treatment characteristics with outcomes. *Arch Phys Med Rehabil*, *94*, 67-74. http://dx.doi.org/10.1016/j.apmr.2012.12.022

Wilson, J. (2012). A Clinical Prediction Model for Long-Term Functional Outcome after Traumatic Spinal Cord Injury Based on Acute Clinical and Imaging Factors. *J Neurotrauma*, *29*(13), 2263-2271. http://dx.doi.org/10.1089/neu.2012.2417

Wilson, J. (2012). Clinical predictors of neurological outcome, functional status, and survival after traumatic spinal cord injury: a systematic review. *J Neurosurg Spine*, 11-26. http://dx.doi.org/10.3171/2012.4.AOSPINE1245

Wilson, J. (2014). Defining age-related differences in outcome after traumatic spinal cord injury: analysis of a combined, multicenter dataset. *Spine J*, *14*(7), 1192-1198. http://dx.doi.org/10.1016/j.spinee.2013.08.005

Wilson, J. (2016). 181 Guidelines for the Management of Patients With Spinal Cord Injury: The Optimal Timing of Decompression. *Neurosurgery*. http://dx.doi.org/10.1227/01.neu.0000489750.82285.7f

Wirth, B. (2008). Changes in activity after a complete spinal cord injury as measured by the Spinal Cord Independence Measure II (SCIM II). *Neurorehabil Neural Repair*, *22*(3), 279-287. Retrieved from MEDLINE database.

Wirz, M. (2005). Effectiveness of automated locomotor training in patients with chronic incomplete spinal cord injury: a multicenter trial. *Arch Phys Med Rehabil*, *86*(4), 672-680. http://dx.doi.org/10.1016/j.apmr.2004.08.004

Wirz, M. (2006). Muscle force and gait performance: relationships after spinal cord injury. *Arch Phys Med Rehabil*, *87*(9), 1218-1222. http://dx.doi.org/10.1016/j.apmr.2006.05.024

Wirz, M. (2010). Outcome after incomplete spinal cord injury: central cord versus Brown-Sequard syndrome. *Spinal Cord*, *48*(5), 407-414. http://dx.doi.org/10.1038/sc.2009.149

Wirz, M. (2015). Recovery of sensorimotor function and activities of daily living after cervical spinal cord injury: the influence of age. *J Neurotrauma*, *32*(3), 194-199. http://dx.doi.org/10.1089/neu.2014.3335

Wolf, A. (2012). The World Health Organization Disability Assessment Scale, WHODAS II: reliability and validity in the measurement of activity and participation in a spinal cord injury population. *J Rehabil Med*, *44*(9), 747-755. http://dx.doi.org/10.2340/16501977-1016

Wong, A. (2003). Clinical trial of acupuncture for patients with spinal cord injuries. *Am J Phys Med Rehabil*, *82*(1), 21-27. http://dx.doi.org/10.1097/01.PHM.0000043517.06642.D0

Wood-Dauphinée, S. (2002). Quality of life in patients with spinal cord injury--basic issues, assessment, and recommendations. *Restor Neurol Neurosci*, 135-149. Retrieved from MEDLINE database.

Wu, Q. (2012). Epidemiology of traumatic cervical spinal cord injury in Tianjin, China. *Spinal Cord*, *50*(10), 740-744. http://dx.doi.org/10.1038/sc.2012.42

Xue, S. (2016). Perceived functional impairment and spirituality/religiosity as predictors of depression in a Sri Lankan spinal cord injury patient population. *Spinal Cord*, *54*(12), 1158-1163. http://dx.doi.org/10.1038/sc.2016.56

Yalc??n, S. (2015). Urodynamic findings, bladder emptying methods and therapeutic approaches in patients with upper lumbar and lower lumbar- sacral spinal cord injury. *Neurol Sci*, *36*(11), 2061-2065. http://dx.doi.org/10.1007/s10072-015-2311-1

Yang, J. (2011). Volitional muscle strength in the legs predicts changes in walking speed following locomotor training in people with chronic spinal cord injury. *Phys Ther*, *91*(6), 931-943. http://dx.doi.org/10.2522/ptj.20100163

Yang, J. (2012). Training to achieve over ground walking after spinal cord injury: a review of who, what, when, and how. *J Spinal Cord Med*, *35*(5), 293-304. http://dx.doi.org/10.1179/2045772312Y.0000000036

Yarkony, G. (1987). Benefits of rehabilitation for traumatic spinal cord injury. Multivariate analysis in 711 patients. *Arch Neurol*, *44*(1), 93-96. Retrieved from Pubmed database.

Yarkony, G. (1990). Rehabilitation outcomes in patients with complete thoracic spinal cord injury. *Am J Phys Med Rehabil*, *69*(1), 23-27. Retrieved from Pubmed database.

Yilmaz, F. (2005). Long-Term Follow-up of Patients with Spinal Cord Injury. *Neurorehabilitation and Neural Repair*, *19*(4). Retrieved from MEDLINE database.

Yokoyama, O. (2006). Paraplegia after aortic aneurysm repair versus traumatic spinal cord injury: functional outcome, complications, and therapy intensity of inpatient rehabilitation. *Arch Phys Med Rehabil*, *87*(9), 1189-1194. http://dx.doi.org/10.1016/j.apmr.2006.05.017

Yoon, E. (2014). Transcranial direct current stimulation to lessen neuropathic pain after spinal cord injury: a mechanistic PET study. *Neurorehabil Neural Repair*, *28*(3), 250-259. http://dx.doi.org/10.1177/1545968313507632

Yozbatiran, N. (2011). Robotic training and clinical assessment of forearm and wrist movements after incomplete spinal cord injury: a case study. *IEEE Int Conf Rehabil Robot*. http://dx.doi.org/10.1109/ICORR.2011.5975425

Yusmido, Y. (2014). Elective proximal lower limb amputation in spinal cord injury patients with chronic pressure ulcers: improve quality of life, function, and shorten hospital stay. Case report. *Eur J Phys Rehabil Med*, *50*(5), 557-560. Retrieved from MEDLINE database.

Zafonte, R. (2003). Spinal epidural abscess: study of early outcome. *J Spinal Cord Med*, *26*(4), 345-351. Retrieved from Pubmed database.

Zariffa, J. (2011). Characterization of neurological recovery following traumatic sensorimotor complete thoracic spinal cord injury. *Spinal Cord*, *49*(3), 463-471. http://dx.doi.org/10.1038/sc.2010.140

Zariffa, J. (2012). Feasibility and efficacy of upper limb robotic rehabilitation in a subacute cervical spinal cord injury population. *Spinal Cord*, *50*(3), 220-226. http://dx.doi.org/10.1038/sc.2011.104

Zariffa, J. (2012). Relationship between clinical assessments of function and measurements from an upper-limb robotic rehabilitation device in cervical spinal cord injury. *IEEE Trans Neural Syst Rehabil Eng*, *20*(3), 341-350. http://dx.doi.org/10.1109/TNSRE.2011.2181537

Zarzaur, B. (2016). Trajectory subtypes after injury and patient-centered outcomes. *J Surg Res*, 103-110. http://dx.doi.org/10.1016/j.jss.2015.12.038

Zeilig, G. (2012). Safety and tolerance of the ReWalk™ exoskeleton suit for ambulation by people with complete spinal cord injury: A pilot study. *J Spinal Cord Med*, *35*(2), 96-101. http://dx.doi.org/10.1179/2045772312Y.0000000003

Zimmerli, L. (2013). Increasing patient engagement during virtual reality-based motor rehabilitation. *Arch Phys Med Rehabil*, *94*(9), 1737-1746. http://dx.doi.org/10.1016/j.apmr.2013.01.029

Zonfrillo, M. (2013). Physical disability after injury-related inpatient rehabilitation in children. *Pediatrics*, 206-213. http://dx.doi.org/10.1542/peds.2012-1418

Zonfrillo, M. (2014). Residual cognitive disability after completion of inpatient rehabilitation among injured children. *J Pediatr*, *164*(1), 130-135. http://dx.doi.org/10.1016/j.jpeds.2013.09.022

Zörner, B. (2010). Clinical algorithm for improved prediction of ambulation and patient stratification after incomplete spinal cord injury. *J Neurotrauma*, *27*(1), 241-252. http://dx.doi.org/10.1089/neu.2009.0901
